RESEARCH ARTICLE

# Single Strand Annealing Plays a Major Role in RecA-Independent Recombination between Repeated Sequences in the Radioresistant *Deinococcus radiodurans* Bacterium

Solenne Ithurbide, Esma Bentchikou, Geneviève Coste, Bruno Bost, Pascale Servant<sup>‡</sup>, Suzanne Sommer<sup>‡\*</sup>

Institute for Integrative Biology of the Cell (I2BC), CEA, CNRS, Université Paris-Sud, Université Paris-Saclay, Gif sur Yvette, France

<sup>‡</sup> These authors are joint senior authors on this work.

\* [suzanne.sommer@i2bc.paris-saclay.fr](mailto:suzanne.sommer@i2bc.paris-saclay.fr)

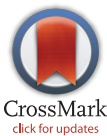

 OPEN ACCESS

**Citation:** Ithurbide S, Bentchikou E, Coste G, Bost B, Servant P, Sommer S (2015) Single Strand Annealing Plays a Major Role in RecA-Independent Recombination between Repeated Sequences in the Radioresistant *Deinococcus radiodurans* Bacterium. PLoS Genet 11(10): e1005636. doi:10.1371/journal.pgen.1005636

**Editor:** Susan T. Lovett, Brandeis University, UNITED STATES

**Received:** July 2, 2015

**Accepted:** October 8, 2015

**Published:** October 30, 2015

**Copyright:** © 2015 Ithurbide et al. This is an open access article distributed under the terms of the [Creative Commons Attribution License](https://creativecommons.org/licenses/by/4.0/), which permits unrestricted use, distribution, and reproduction in any medium, provided the original author and source are credited.

**Data Availability Statement:** All relevant data are within the paper and its Supporting Information files.

**Funding:** This work was supported by the Centre National de la Recherche Scientifique ([www.cnrs.fr](http://www.cnrs.fr)), the University Paris-Sud ([www.u-psud.fr](http://www.u-psud.fr)), the Agence Nationale de la Recherche (ANR "Radioresistance"-11-BSV3-01701 to SS and Electricité de France (RB2011-17 to SS, [www.edf.com](http://www.edf.com)). The funders had no role in study design, data collection and analysis, decision to publish, or preparation of the manuscript.

## Abstract

The bacterium *Deinococcus radiodurans* is one of the most radioresistant organisms known. It is able to reconstruct a functional genome from hundreds of radiation-induced chromosomal fragments. Our work aims to highlight the genes involved in recombination between 438 bp direct repeats separated by intervening sequences of various lengths ranging from 1,479 bp to 10,500 bp to restore a functional *tetA* gene in the presence or absence of radiation-induced DNA double strand breaks. The frequency of spontaneous deletion events between the chromosomal direct repeats were the same in *recA*<sup>+</sup> and in  $\Delta$ *recA*,  $\Delta$ *recF*, and  $\Delta$ *recO* bacteria, whereas recombination between chromosomal and plasmid DNA was shown to be strictly dependent on the RecA and RecF proteins. The presence of mutations in one of the repeated sequence reduced, in a MutS-dependent manner, the frequency of the deletion events. The distance between the repeats did not influence the frequencies of deletion events in *recA*<sup>+</sup> as well in  $\Delta$ *recA* bacteria. The absence of the UvrD protein stimulated the recombination between the direct repeats whereas the absence of the DdrB protein, previously shown to be involved in DNA double strand break repair through a single strand annealing (SSA) pathway, strongly reduces the frequency of RecA- (and RecO-) independent deletions events. The absence of the DdrB protein also increased the lethal sectoring of cells devoid of RecA or RecO protein.  $\gamma$ -irradiation of *recA*<sup>+</sup> cells increased about 10-fold the frequencies of the deletion events, but at a lesser extent in cells devoid of the DdrB protein. Altogether, our results suggest a major role of single strand annealing in DNA repeat deletion events in bacteria devoid of the RecA protein, and also in *recA*<sup>+</sup> bacteria exposed to ionizing radiation.

**Competing Interests:** The authors have declared that no competing interests exist.

## Author Summary

*Deinococcus radiodurans* is known for its exceptional ability to tolerate exposure to DNA damaging agents and, in particular, to very high doses of ionizing radiation. This exceptional radioresistance results from many features including efficient DNA double strand break repair. Here, we examine genome stability in *D. radiodurans* before and after exposure to ionizing radiation. Rearrangements between repeated sequences are a major source of genome instability and can be deleterious to the organism. Thus, we measured the frequency of recombination between direct repeats separated by intervening sequences of various lengths in the presence or absence of radiation-induced DNA double strand breaks. Strikingly, we showed that the frequency of deletions was as high in strains devoid of the RecA, RecF or RecO proteins as in wild type bacteria, suggesting a very efficient RecA-independent process able to generate genome rearrangements. Our results suggest that single strand annealing may play a major role in genome instability in the absence of homologous recombination.

## Introduction

The extreme resistance of the bacterium *D. radiodurans* to DNA-fragmenting treatments, such as ionizing radiation or desiccation, is correlated with the ability to reconstruct a functional genome from hundreds of chromosomal fragments. The rapid reconstitution of an intact genome is thought to occur through an extended synthesis-dependent strand annealing process (ESDSA) followed by DNA recombination [1,2]. During ESDSA, chromosomal fragments with overlapping regions are used both as primers and templates for a massive synthesis of single-stranded DNA extensions. Newly synthesized complementary single stranded DNA extensions appear to anneal so that contiguous DNA fragments are joined together forming long linear intermediates. These intermediates require RecA-dependent homologous recombination to mature into reconstituted circular chromosomes representing DNA patchworks of numerous double-stranded DNA blocks synthesized before irradiation connected by DNA blocks synthesized after irradiation.

We have recently shown that the Deinococcal RecF, RecO, RecR proteins, by their ability to load RecA onto its single-stranded DNA substrate, play a crucial role in DNA double strand break repair via ESDSA and recombinational repair pathways [3]. Mutant  $\Delta uvrD$  bacteria showed a markedly decreased radioresistance, an increased latent period in the kinetics of DNA double strand break repair and a slow rate of fragment assembly correlated with a slow rate of DNA synthesis, suggesting that UvrD helicase might be involved in the processing of double stranded DNA ends and/or in the DNA synthesis step of ESDSA [3].

More recently, it was proposed that a single strand annealing (SSA) process participates in an early step of DNA double strand break repair by facilitating the accurate assembly of small fragments to generate suitable substrates for subsequent ESDSA-promoted genome reconstitution [4]. The DdrB protein was previously shown to exhibit *in vitro* properties akin to those of SSB protein [5] but also to promote annealing of single stranded DNA [6]. The DdrB protein, recruited early after irradiation into the nucleoid, was also shown to be involved in the slow DNA double strand break repair observed in cells devoid of the RecA protein, and thus to play a major role in RecA-independent DNA double strand break repair through SSA [4,6].

Rearrangements between repeated sequences are a major source of genome instability and can be deleterious to the organism. These rearrangements can result in deletion or duplication of genetic material flanked by direct repeats. In *Escherichia coli*, recombination between

directly repeated sequences occurs via both RecA-independent and RecA-dependent mechanisms, depending on the size of the repeats and of the intervening sequences between the repeated sequences [7–9]. Insertion of a sizable DNA sequence in between the repeated sequences substantially increased the RecA dependence, suggesting that increasing the distance separating the homologous regions preferentially inhibits the RecA-independent recombination in *E. coli* [9,10]. In *E. coli*, RecA-independent rearrangements between short repeats, such as deletions, are stimulated by mutations that affect the DNA polymerase or other proteins involved in DNA replication [11–13] leading to the proposal that these events occur during DNA replication by a mechanism involving mispairing of the newly synthesized DNA strand with an alternative complementary template sequence located nearby [7,12] (for review, see [14,15]). An alternate mechanism for RecA-independent deletion events involves DNA breakage, exonucleolytic erosion of the DNA ends and single strand annealing (SSA) of exposed complementary single stranded DNA [14]. A single strand annealing mechanism has also been proposed for RecA-independent deletions associated with a restart of collapsed replication forks [7,11,12,14,16]. Here, we measured the frequency of recombination between direct repeats separated by intervening sequences of various lengths restoring a functional *tetA* gene in the presence or absence of radiation-induced DNA double strand breaks in *D. radiodurans*. We also assessed the involvement of the RecA, RecO, RecF, UvrD and DdrB proteins in the deletion process. The role of these proteins in the progression of replication forks was also discussed.

## Results

### Efficient RecA-independent recombination between direct repeats in *D. radiodurans*

To investigate the role of recombination proteins in the occurrence of repeat-mediated deletion events in *D. radiodurans*, we constructed a mutated *tetA* allele bearing an internal duplication and a *spc* cassette inserted between the duplicated regions. The engineered *tetA* allele was inserted into the dispensable *amyE* locus of chromosome 1 and provided a recombination substrate in which the direct repeats (438 bp long) were separated by a 1,479 bp spacer (Fig 1A). Precise deletion of one of the direct repeats and the intervening sequence restores the wild type *tetA* allele. The presence of a functional *tetA* gene on one copy of chromosome 1 suffices to confer tetracycline resistance to the cells, although *D. radiodurans* bacteria contain 4 to 10 genome equivalents per cell. In contrast, when the deletion of a gene generates a loss-of-function mutant, all the copies of the gene must be eliminated to detect the mutant phenotype, and failure to obtain a homozygote provides a first indication that the gene might encode a function essential for cell viability [3,17].

The frequency of spontaneous deletion events in a population was estimated by measuring the frequency of [Tet<sup>R</sup>] bacteria. As shown in Fig 1B, the median of the frequencies of [Tet<sup>R</sup>] in the wild type bacteria was  $6.5 \times 10^{-4}$  and did not decrease in  $\Delta recA$  bacteria (median value:  $8 \times 10^{-4}$ ). Does the apparent RecA-independent high frequency of deletion events result from a functional redundancy of RecA activities in the cells? We tested the involvement of the RadA protein, a RecA-related protein, and showed that wild type frequencies of deletions were found in  $\Delta radA$  and in  $\Delta recA \Delta radA$  bacteria (Fig 1B), suggesting that the RadA protein was not required in RecA-independent recombination to compensate for the absence of the RecA protein. We also observed that the frequency of [Tet<sup>R</sup>] bacteria was not reduced in cells devoid of RecF or RecO proteins required for loading RecA onto its single-stranded DNA substrate (Fig 1B). Altogether, our results suggest an important contribution of RecA-independent mechanisms in the generation of deletions between repeated DNA sequences in *D. radiodurans*.

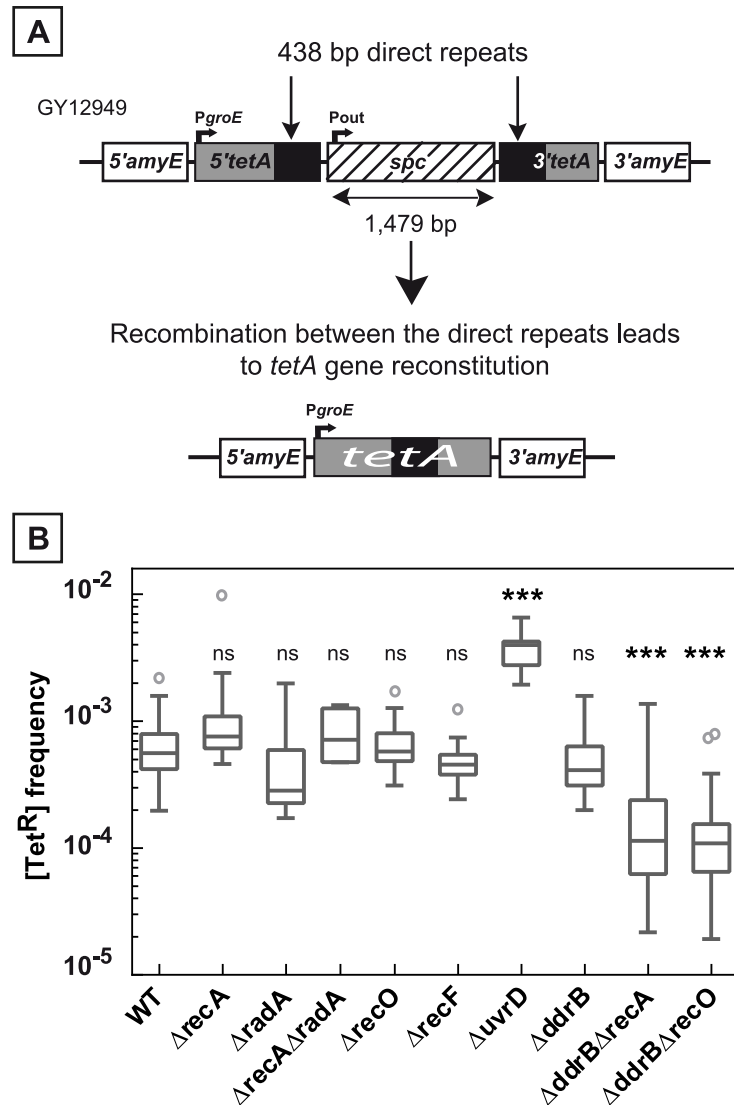

**Fig 1. Deletion frequency between repeated sequences depends on the genetic context.** **A.** Schematic representation of the genetic recombination assay. The 5' and 3' parts of the *tetA* gene, containing 438 bp repeats (black boxes) separated by an intervening sequence of 1,479 bp encoding a *spc* gene conferring resistance to spectinomycin, were introduced into the dispensable *amyE* gene locus. Recombination between the repeats leads to the *tetA* gene reconstitution conferring tetracycline resistance to bacteria. **B.** Medians of [Tet<sup>R</sup>] frequencies in WT (GY12949),  $\Delta recA$  (GY15184),  $\Delta radA$  (GY12956),  $\Delta recA \Delta radA$  (GY12971),  $\Delta recO$  (GY12963),  $\Delta recF$  (GY12955),  $\Delta uvrD$  (GY12953),  $\Delta ddrB$  (GY16016),  $\Delta ddrB \Delta recA$  (GY16628), and  $\Delta ddrB \Delta recO$  (GY16638) mutant strains are represented by Tukey box plots. Outliers are represented by open circles. Medians were calculated from 12 to 53 independent values (except for medians calculated from at least 4 independent values in  $\Delta radA$  and  $\Delta recA \Delta radA$  bacteria). Statistically significant differences in the medians of recombination frequencies of the mutants, compared to those observed in strain GY12949, were calculated using the non-parametric Dunn's multiple comparison test: \*  $P < 0.05$ ; \*\*  $P < 0.01$ ; \*\*\*  $P < 0.001$ ; ns if  $P > 0.05$ .

doi:10.1371/journal.pgen.1005636.g001

To test whether the same 438 bp homologous fragments can undergo efficient RecA-dependent recombination, we constructed a plasmid-by-chromosome recombination assay in which the recombining *tetA* fragments were placed in a different configuration, one being located at the chromosomal *amyE* locus and the other on a resident plasmid (Fig 2A). In this assay, the reconstitution of a functional *tetA* gene resulted from the integration of the plasmid into the

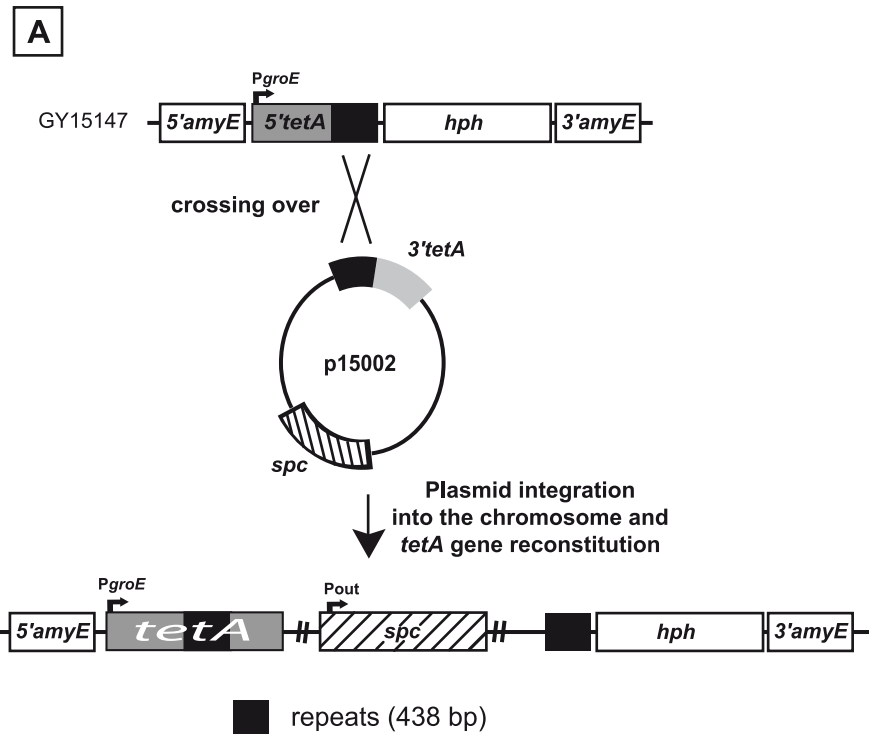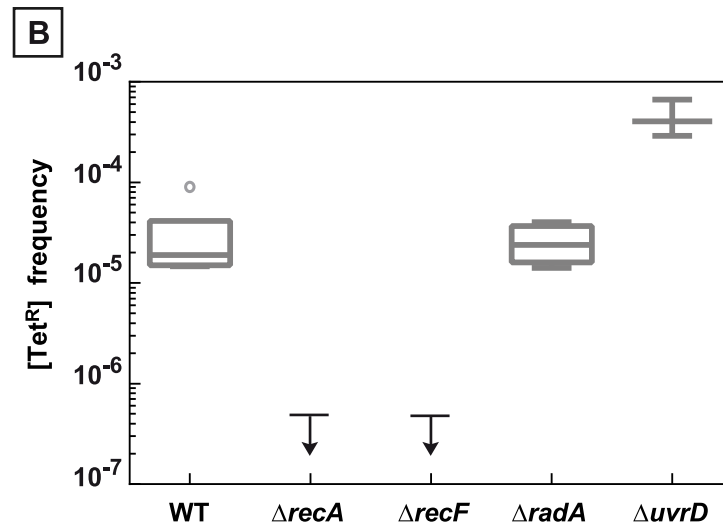

**Fig 2. Recombination between chromosomal and plasmid DNA is RecA- and RecF-dependent. A.** Schematic representation of the recombination assay between chromosomal and plasmid DNA. The 5'*tetA* and the 3'*tetA* regions of the *tetA* gene, containing 438 bp repeats, were introduced into the chromosomal dispensable *amyE* gene and into the p11554 plasmid giving rise to plasmid p15002, respectively. One crossing over between the two 438 bp repeated sequences (black boxes) leads to the reconstitution of a functional *tetA* gene and the integration of the plasmid into chromosomal DNA. **B.** Medians of [Tet<sup>R</sup>] frequencies in WT (GY15147), Δ*recA* (GY15158), Δ*recF* (GY15160), Δ*radA* (GY15149), and Δ*uvrD* (GY15156) bacteria, all containing the p15002 plasmid, are calculated from at least 3 independent values and represented by Tukey boxplots. Outliers are represented by open circles. The small arrows attached to the horizontal line representing the upper limit of detectable [Tet<sup>R</sup>] frequencies indicate that [Tet<sup>R</sup>] frequencies were < 5 × 10<sup>-7</sup> for Δ*recA* and Δ*recF* bacteria.

doi:10.1371/journal.pgen.1005636.g002

chromosomal DNA as verified by PCR analysis of few [Tet<sup>R</sup>] colonies (S1 Fig). The integration event is well tolerated by the cell, since we used a low copy number plasmid p15002, a derivative of plasmid pI8 maintained at 4 to 10 copies per cell in *D. radiodurans* [18]. As can be seen in Fig 2B, the frequency of [Tet<sup>R</sup>] bacteria dropped from a median value of  $2 \times 10^{-5}$  in the wild type to less than  $5 \times 10^{-7}$  in cells devoid of the RecA or the RecF proteins, indicating that the 438 bp homologous fragments recombine through a classical RecA-promoted strand exchange mechanism. In contrast, loss of the RadA protein did not impair recombination efficiency. In *E. coli*, the RadA protein has been involved in processing of branched recombination intermediates. However single *radA* mutants have a modest effect on recombination and DNA survival while they show a strong synergistic effect in combination with mutations in the *recG* or the *ruvAB* Holliday junction proteins [19,20].

### Differences between the DNA repeats reduces the frequency of the deletion events

The presence of mutations in one of the 438 bp repeats (Fig 3A) reduced the frequency of the deletion events between the chromosomal repeats. A single mutation sufficed to significantly decrease the frequency of the deletion events as shown by median values that decreased by a factor of 4.8 in *recA*<sup>+</sup> bacteria and 4.6 in  $\Delta recA$  bacteria, when compared to fully homologous repeats. The decrease was greater when 3 mutations were present in one of the repeats, yielding reduction factors of 10.0 and 19.0 in *recA*<sup>+</sup> and  $\Delta recA$  bacteria, respectively (Fig 3B). A plot of the frequency of [Tet<sup>R</sup>] bacteria as a function of the number of differences shows a linear decrease in the deletion frequency with similar regression slopes in *recA*<sup>+</sup> and  $\Delta recA$  bacteria (S2 Fig).

A similar analysis was performed in *recA*<sup>+</sup>  $\Delta mutS$  and  $\Delta recA$   $\Delta mutS$  bacteria devoid of the MutS protein, the key enzyme involved in mismatch recognition. The data (Fig 3B and S2 Fig) show that in this case the differences between the repeats did not significantly affect the deletion frequency. These results suggest that, as in homologous recombination intermediates, a heteroduplex DNA is formed during RecA-independent processes leading to the reconstitution of a functional *tet* gene and that an efficient mismatch repair aborts recombination between the DNA repeats in  $\Delta recA$  as well as in *recA*<sup>+</sup> bacteria.

### Absence of UvrD increases the frequency of deletions between the repeats

It was previously shown that *uvrD* mutations stimulate RecA-dependent recombination [21–23] and enhance tandem repeat deletions in *E. coli* [23]. Here, we show that the absence of UvrD enhanced the efficiency of RecA-dependent recombination between chromosomal and plasmid DNA by a factor of 21.2 (Fig 2B), suggesting that deinococcal UvrD protein possesses an anti-RecA activity as previously shown for the *E. coli* UvrD protein [24,25]. The absence of UvrD also enhanced the frequency of deletions between the chromosomal direct repeats by a factor of 7.1 (Fig 1B). This increase may be due to the anti-RecA activity of UvrD protein that can possibly inhibit RecA-dependent recombination between the repeated sequences in a *recA*<sup>+</sup> *uvrD*<sup>+</sup> background. However, the absence of UvrD might also disturb DNA replication, and thus increase genome instability. A clue to understand how the absence of the UvrD protein might be involved, independently of its anti-RecA activity, in the stimulation of deletion events requires an analysis of its effects in a recombination-deficient background. Unfortunately, we were unable to obtain homozygotes for *recA*, *recF* or *recO* deletion in combination with a *uvrD* deletion, even after extensive purification steps (S3 Fig), suggesting that *uvrD* deletion is lethal with a *recA*, *recF* or *recO* deletion. We propose that the UvrD protein, by

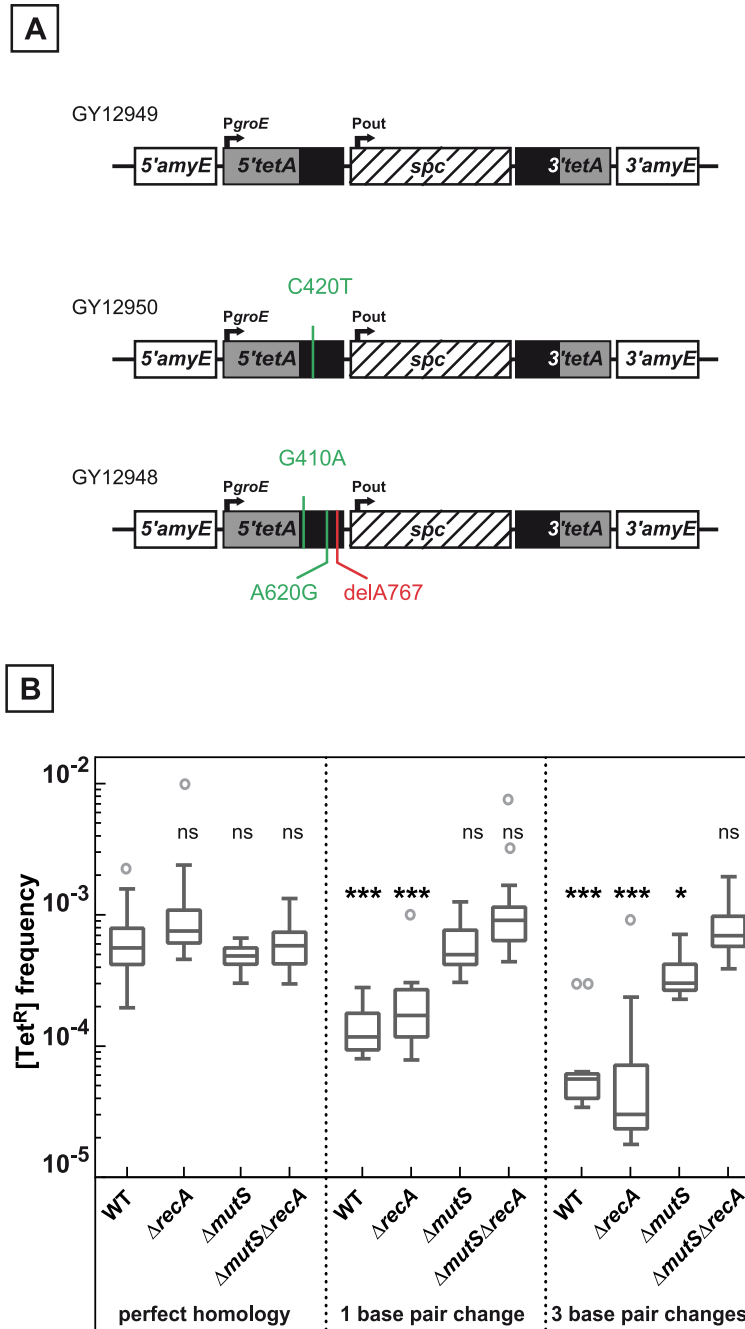

**Fig 3. Effect of base pair changes in the repeats on their recombination frequencies. A.** Schematic representation of the recombination substrates containing 1 or 3 bp changes. The positions of the base pair changes calculated from the initiation codon in the 5'tetA region are indicated. **B.** Medians of [Tet<sup>R</sup>] frequencies calculated from 14 to 43 independent values in WT (GY12949), ΔrecA (GY15184), ΔmutS (GY12978), ΔmutS ΔrecA (GY16620) bacteria containing identical repeated sequences, WT (GY12950), ΔrecA (GY16624), ΔmutS (GY12980), ΔmutS ΔrecA (GY16618) containing one base difference in the repeated sequences, and WT (GY12948), ΔrecA (GY16622), ΔmutS (GY12979), ΔmutS ΔrecA (GY16616) containing 3 base differences in the repeated sequences, are represented by Tukey boxplots. Outliers are represented by open circles. Statistically significant differences in the medians of recombination frequencies of the mutants and WT containing sequence differences in the repeated sequence compared to GY12949 were calculated using the non-parametric Dunn's multiple comparison test: \* P < 0.05; \*\* P < 0.01; \*\*\* P < 0.001; ns if P > 0.05.

doi:10.1371/journal.pgen.1005636.g003



displacing obstacles downstream of the replisome, plays an important role in the progression of replication forks (see [discussion](#)).

### Loss of viability of $\Delta ddrB \Delta recA$ and $\Delta ddrB \Delta recO$ double mutants

Previous *in vitro* and *in vivo* results suggest that the DdrB protein plays a major role in a single strand annealing process (SSA) that operates early in genome reconstitution after DNA damage [4,6]. Single strand annealing is the only activity of DdrB known besides binding to single strand DNA [5,6]. Thus, to analyse the involvement of SSA in generating deletions via a RecA-independent pathway, we decided to construct double mutants devoid of DdrB and RecA or RecO proteins. Homogenotization of  $\Delta ddrB \Delta recA$  and  $\Delta ddrB \Delta recO$  double mutants was difficult, requiring 7 steps of purification, suggesting growth inhibition of the mutated cells (S3 Fig). Thus, we compared the growth rate and the plating efficiency of the double mutants with those of the single  $\Delta ddrB$ ,  $\Delta recA$  and  $\Delta recO$  mutants and of the parental wild type strain. Wild type and  $\Delta ddrB$  bacteria exhibited a generation time of 105 min. The recombination deficient bacteria grew more slowly, as  $\Delta recA$  and  $\Delta recO$  bacteria during exponential growth showed a generation time of 285 min whereas  $\Delta ddrB \Delta recO$  and  $\Delta ddrB \Delta recA$  exhibited a generation time of 370 min. Moreover, during exponential growth phase, the single  $\Delta recA$  and  $\Delta recO$  mutants had a 15 fold decreased plating efficiency as compared with the wild type, whereas the  $\Delta ddrB \Delta recA$  and  $\Delta ddrB \Delta recO$  double mutants had a 35 fold decreased plating efficiency (Fig 4). These results suggest that the DdrB protein may be involved in management of blocked replication forks in the absence of the RecA or RecO proteins. Another striking result was the increased lethality of the recombination deficient mutants in late stationary phase. Indeed, after reaching a plateau

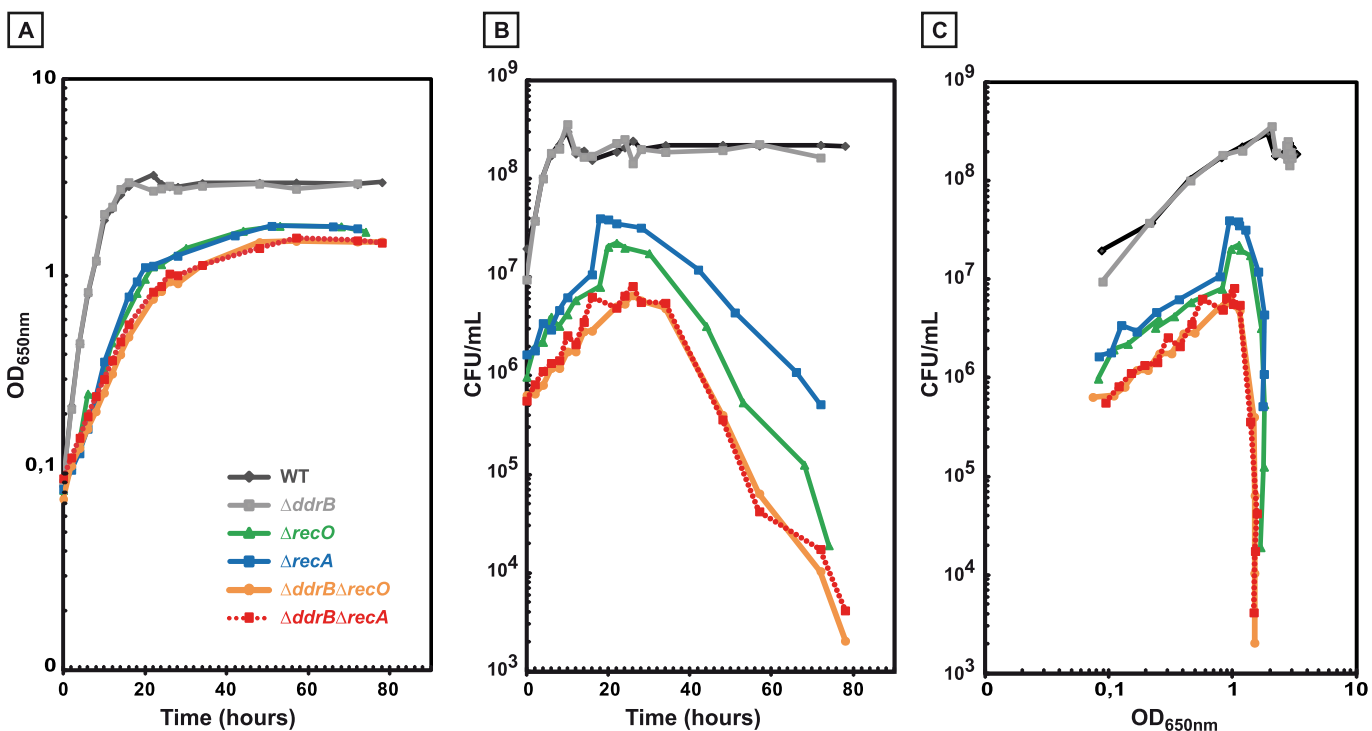

**Fig 4. Impaired growth and stationary-phase lethality of recombination-deficient mutant cells.** GY9613 (WT) (black diamonds), GY13915 ( $\Delta ddrB$ ) (grey squares), GY15125 ( $\Delta recO$ ) (green triangles), GY12968 ( $\Delta recA$ ) (blue squares), GY16626 ( $\Delta ddrB \Delta recA$ ) (red squares and interrupted lines), GY16636 ( $\Delta ddrB \Delta recO$ ) (orange circles) were grown from independent colonies at 30°C to an  $OD_{650nm} = 0.1$  (time 0 of the growth curves). **A.**  $OD_{650nm}$  as a function of time. **B.** Colony forming units as a function of time. **C.** Colony forming units as a function of  $OD_{650nm}$ .

doi:10.1371/journal.pgen.1005636.g004



after 6 hours of incubation for the wild type and  $\Delta ddrB$  bacteria, the number of CFU did not decrease during 70 additional hours of incubation. In contrast, the single  $\Delta recA$  and  $\Delta recO$  recombination deficient mutants and the double  $\Delta ddrB \Delta recA$  and  $\Delta ddrB \Delta recO$  mutants reached a plateau after 18 to 20 hours of incubation and the number of CFU decreased 2–3 orders of magnitude after 30 hours of incubation (Fig 4) suggesting that DNA lesions are generated during prolonged stationary phase and require recombination functions to be repaired.

### An important role of DdrB in the recombination process between repeated sequences in the absence of RecA or RecO proteins

We found that the absence of DdrB had a strong negative effect on the frequencies of deletion events between the chromosomal repeats generated via a RecA-independent pathway. Indeed, when the repeats are separated by 1,479 bp, the median values of the deletion frequencies in  $\Delta ddrB \Delta recA$  and  $\Delta ddrB \Delta recO$  bacteria decreased by a factor of 4.9 and 5.1 respectively, as compared to their  $\Delta recA$  and  $\Delta recO$  counterparts (Fig 1B). These results indicate that 80% of the [Tet<sup>R</sup>] bacteria generated in the absence of RecA or RecO proteins were formed in a DdrB-dependent manner, suggesting a major role of single strand annealing in RecA-independent recombination between the direct repeats. We can also hypothesize that the DdrB protein might be involved in the stabilization of DNA polymerase template switching intermediates.

### The frequency of deletion events does not decrease when the length of the spacers between the repeated sequences was as large as 10,500 bp

In *E. coli*, in which both RecA-dependent and RecA-independent mechanisms can contribute to recombination between direct repeats, deletion events become increasingly RecA-dependent as the distance between the repeated sequences increases [9]. To verify if this also applies in *D. radiodurans*, we modified the test deletion construct shown in Fig 1 by replacing the 1,479 bp spacer with sequences of increasing length to analyse the impact of the distance between the repeats on the incidence of deletions and their genetic control (Fig 5A).

We found that the increase of the distance between the repeats from 1,479 bp (Fig 1A) up to 10,500 bp (Fig 5A) had no effect on the deletion frequency in  $recA^+$  as well as in  $\Delta recA$  or  $\Delta recF$  hosts (compare the [Tet<sup>R</sup>] frequencies in Figs 1B, 5B, 5C and 5D). Likewise, the distance between the repeats had no effect on the stimulation of deletion events by the absence of the UvrD protein (Figs 1B, 5B, 5C and 5D).

In contrast, the involvement of DdrB in the deletion events became more apparent when the distance between the repeats increased. Indeed, while a DdrB deficiency had no effect on the frequency of deletions in a  $recA^+$  background when the spacer between the repeats was 1,479 bp long, it produced a 2 to 3-fold decrease in the deletion frequency when the spacer length increased (Figs 1B, 5B, 5C and 5D). When the  $ddrB$  deletion was associated with a  $recA$  deletion, the reduction factors were found to be between 18- and 20-fold if the length of the intervening sequences was  $\geq 3,500$ bp as compared to their single  $\Delta recA$  counterparts (Fig 5B, 5C and 5D). A similar effect of a  $ddrB$  deletion was also observed in cells devoid of the RecO protein (Fig 5B, 5C and 5D). These results suggest that, in the absence of the RecA-promoted homologous recombination, approximately 95% of the recombination events were dependent on the DdrB protein and may be related to an SSA pathway.

### Induction of recombination between direct repeats by ionizing radiation

We used our deletion assay to analyze the impact of the presence of repeated sequence on the stability of the genome in  $\gamma$ -irradiated cells during the process of genome reconstitution. We

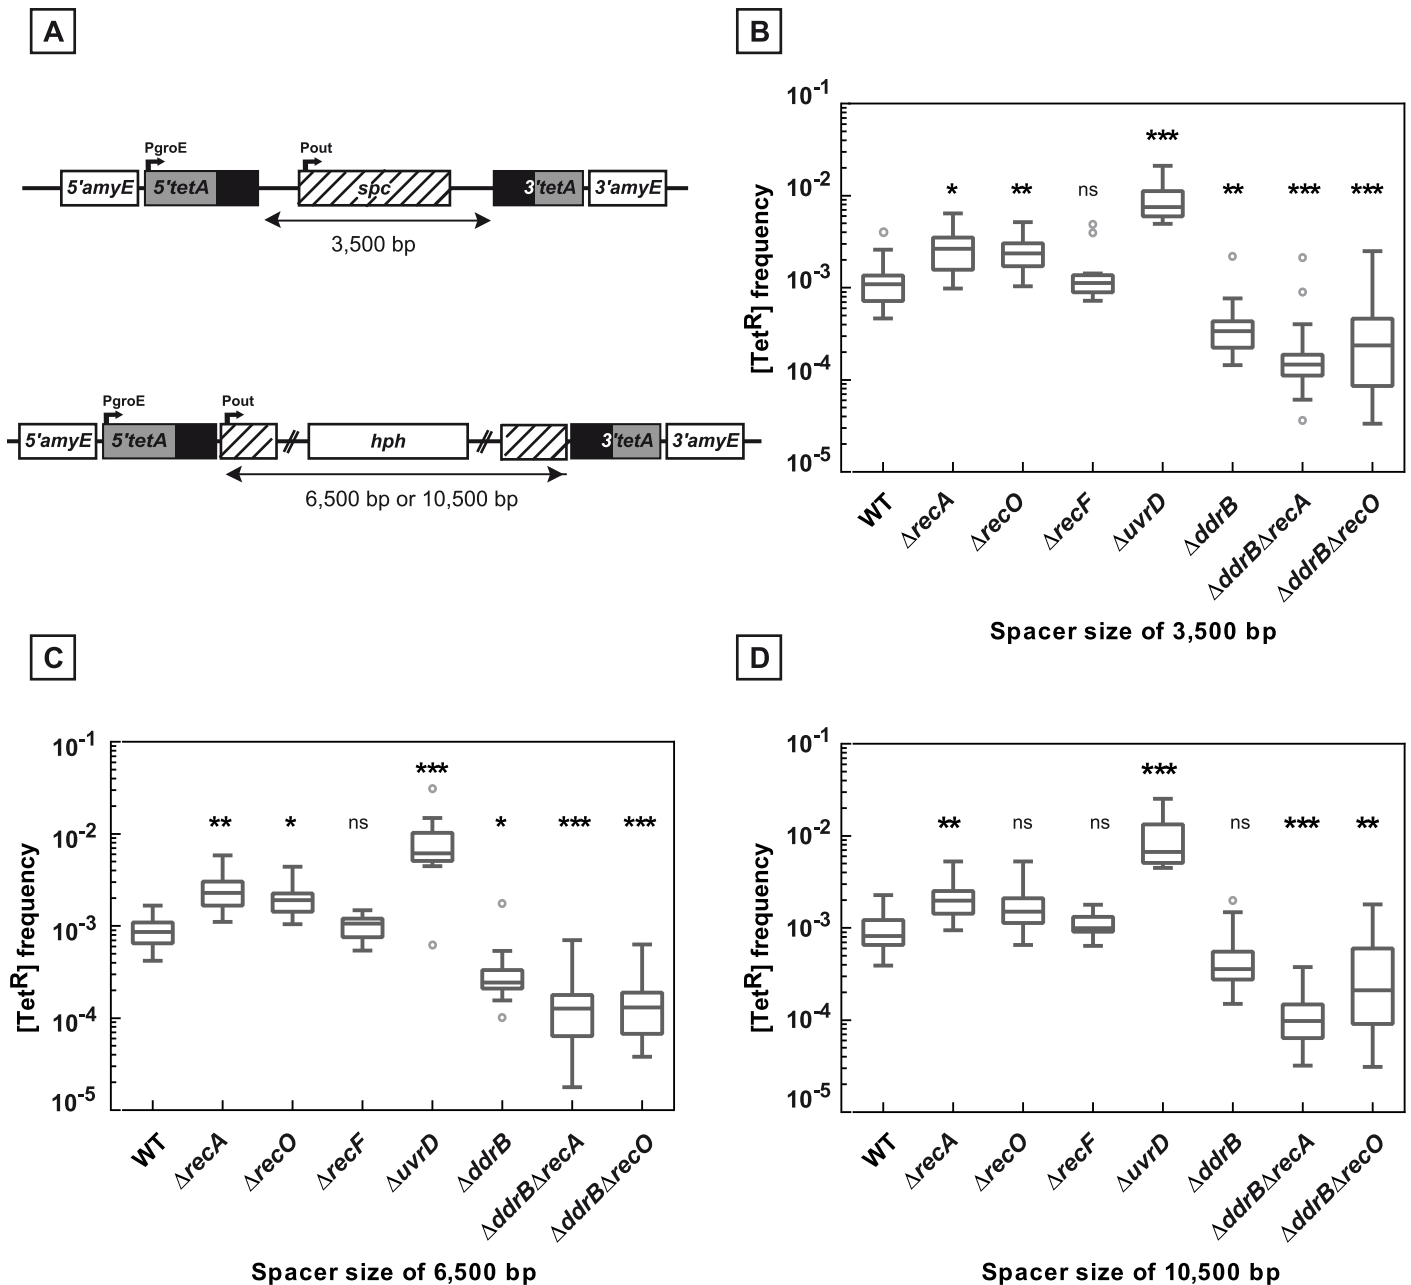

**Fig 5. Deletion frequencies between repeated sequences separated by 3,500, 6,500, and 10,500 bp.** **A.** Schematic representation of the constructions used. **B., C., D.** Bacteria contain 3,500 bp (panel B), 6,500 bp (panel C), and 10,500 bp (panel D) intervening sequences between the *tetA* repeats. The medians of [Tet<sup>R</sup>] frequencies calculated from 10 to 35 independent values in the tested strains are represented by Tukey boxplots. Outliers are represented by open circles. Statistically significant differences in the medians of recombination frequencies of the mutants compared to the WT GY16209, GY16227, and GY16235 in panel B, C, and D, respectively, were calculated using the non-parametric Dunn's multiple comparison test: \* P < 0.05; \*\* P < 0.01; \*\*\* P < 0.001; (ns) if P > 0.05. **B.** WT (GY16209), Δ*recA* (GY16238), Δ*recO* (GY16262), Δ*recF* (GY16264), Δ*uvrD* (GY16608), Δ*ddrB* (GY16268), Δ*ddrB* Δ*recA* (GY16630), Δ*ddrB* Δ*recO* (GY16640) **C.** WT (GY16227), Δ*recA* (GY16244), Δ*recO* (GY16278), Δ*recF* (GY16276), Δ*uvrD* (GY16612), Δ*ddrB* (GY16282), Δ*ddrB* Δ*recA* (GY16632), Δ*ddrB* Δ*recO* (GY16642) **D.** WT (GY16235), Δ*recA* (GY16252), Δ*recO* (GY16290), Δ*recF* (GY16292), Δ*uvrD* (GY16614), Δ*ddrB* (GY16296), Δ*ddrB* Δ*recA* (GY16634), Δ*ddrB* Δ*recO* (GY16644).

doi:10.1371/journal.pgen.1005636.g005

showed that the frequency of repeat-induced deletions restoring a functional *tetA* gene increased as a function of the dose of  $\gamma$ -irradiation used (Fig 6A). Thus, we further exposed the cells to 5 kGy  $\gamma$ -irradiation, a dose producing hundreds of DNA double strand breaks [26]. The repeats in the tested cells were separated either by 1,479 bp (“short” spacer), 3,500 bp, 6,500 bp, or by 10,500 bp (“long” spacer) sequences. The deletion analysis was performed only in a *recA*<sup>+</sup> background, since the extreme radio-sensitivity of  $\Delta recA$  or  $\Delta recF$  bacteria (cell survival was less than  $10^{-5}$  after exposure to 5 kGy) precluded the inclusion of these cells in the genetic assay. The deletions were induced by exposure to  $\gamma$ -irradiation independently of the length of the spacers (Fig 6B).

As shown in Fig 6, in the wild type bacteria, the deletion frequency increased by 11.9 fold and 5.9 fold after irradiation when the repeats are separated by the “short” spacer and the “long” spacer, respectively (compare left panels in Fig 6C and 6D). In cells devoid of the UvrD protein, the frequency of deletions moderately increased after irradiation (induction factors of 1.45 and 1.7 for the “short” and “long” spacer, respectively), likely because these cells already have an elevated spontaneous level of recombination in the absence of irradiation (compare right panels in Fig 6C and 6D). In contrast, cells devoid of the DdrB protein showed a marked reduction in the induced levels of deletion events (compare middle panels in Fig 6C and 6D), suggesting that single strand annealing might play an important role in the generation of the [Tet<sup>R</sup>] recombinants during genome reconstitution after irradiation.

## Discussion

Repeated sequences are targeted by recombination processes leading to amplifications, deletions, and other rearrangements of the genetic material. These events play an important role in genome plasticity and rapid adaptation to environmental challenges, but are also potential source of genome instability and can be deleterious to an organism (see for review [27]). *D. radiodurans* contains an enhanced number of repetitive sequences as compared to other bacteria, including insertion sequences, small non-coding repeats, and intragenic repeats (see for review [28]). This bacterium is also known for its capacity to reconstitute an entire genome from a myriad of fragments after exposure to elevated  $\gamma$ -irradiation doses. Genome reconstitution occurs through extended synthesis dependent single strand annealing (ESDSA) followed by classical homologous recombination. In heavily irradiated cells, a RecA-independent single strand annealing (SSA) process takes place before ESDSA allowing the assembly of small fragments into substrates that can be further processed through ESDSA. The single strand annealing activity of the DdrB protein plays a major role in this early step of DNA double strand break repair [4].

Here, we show that DdrB also plays a key role in RecA-independent recombination between direct repeats, leading to the occurrence of deletions, and substantially contributes to the induction of deletions in  $\gamma$ -irradiated *recA*<sup>+</sup> bacteria. Our results points to an important contribution of a DdrB-dependent pathway in *D. radiodurans* genome plasticity.

### Efficient mechanisms ensure recombination between chromosomal direct repeats in *D. radiodurans* cells devoid of the RecA protein

Here, we determined the frequencies of spontaneous and radiation-induced recombination between chromosomal direct repeats and investigated the role of RecA and of other key recombination and repair proteins in the occurrence of these events in *D. radiodurans*. We found that recombination events restoring a functional *tetA* gene occurred at a very high frequency. In a *recA*<sup>+</sup> background, the median frequency of [Tet<sup>R</sup>] cells was equal to  $6.5 \times 10^{-4}$  (Figs 1, 5B, 5C and 5D), values more than 10-fold higher than those measured in a study that used a similar

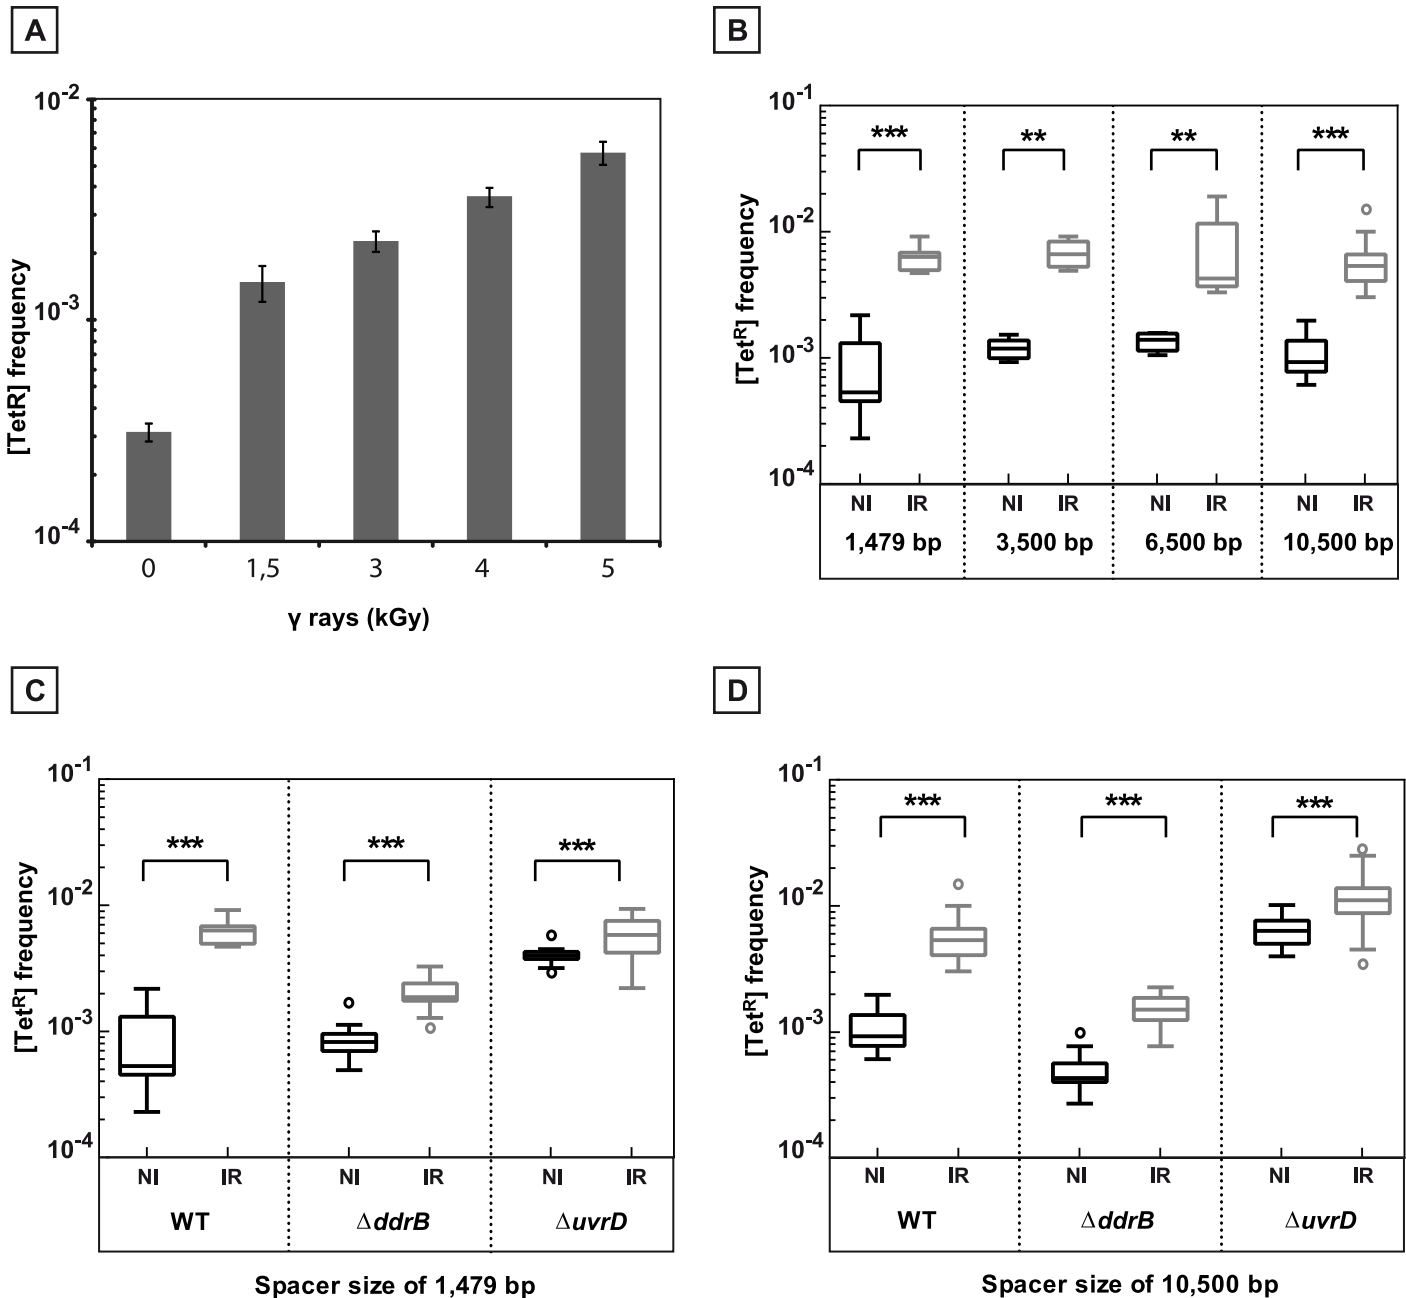

**Fig 6.  $\gamma$ -irradiation induced recombination between repeated sequences.** **A.** Induction of recombination between repeated sequences separated by 1,479 bp as a function of the radiation dose. [Tet<sup>R</sup>] frequencies were measured in at least 5 independent cultures after 20 hours of post irradiation incubation of GY12949 in TGY medium after exposure to different  $\gamma$ -irradiation doses. **B.** Induction by exposure to  $\gamma$ -irradiation of recombination between repeats separated by intervening sequences of increasing length: 1,479 bp (GY12949), 3,500 bp (GY16209), 6,500 bp (GY16227) and 10,500 bp (GY16235). **C.**  $\gamma$ -promoted induction of recombination between overlapping sequences separated by 1,479 bp in WT (GY12949),  $\Delta ddrB$  (GY16016), and  $\Delta uvrD$  (GY12953) bacteria. **D.**  $\gamma$ -promoted induction of recombination between overlapping sequences separated by 10,500 bp in WT (GY16235),  $\Delta ddrB$  (GY16296),  $\Delta uvrD$  (GY16614). **B., C., D.** Medians of the [Tet<sup>R</sup>] frequencies calculated from 5 to 30 independent values are represented by Tukey boxplots. Outliers were represented by open circles. Statistically significant differences in the medians of recombination frequencies between irradiated and the corresponding non-irradiated bacteria were calculated using the non-parametric Mann-Whitney test: \*  $P < 0.05$ ; \*\*  $P < 0.01$ ; \*\*\*  $P < 0.001$ ; (ns) if  $P > 0.05$ . NI: non-irradiated bacteria. IR: irradiated bacteria.

doi:10.1371/journal.pgen.1005636.g006

substrate (chromosomal 358 bp direct repeats separated by an intervening sequence of 850 bp) to measure recombination in *Helicobacter pylori*, a bacterium known for its high recombination proficiency [29]. Moreover, inactivation of *recA* resulted in a 10-fold decrease in recombination between the direct repeats in *H. pylori* [29]. In contrast, introduction of a  $\Delta recA$ ,  $\Delta recF$  or  $\Delta recO$  mutation in the *D. radiodurans* tester strains did not change the elevated recombination frequencies between the repeats (Figs 1, 5B, 5C and 5D). In *E. coli* and in *B. subtilis*, the distance between the repeats plays a key role in determining the mechanisms involved in the recombination processes, the efficiency of RecA-independent recombination decreasing sharply when the distance between the repeats increases [9, 10, 30]. No such proximity effect was observed in *D. radiodurans*. Indeed, the frequency of appearance of the recombinants in our assay remained elevated in  $\Delta recA$  (and  $\Delta recF$  or  $\Delta recO$ ) bacteria as in the parental *rec*<sup>+</sup> bacteria when the spacer between the repeats increased from 1,479 up to 10,500 bp (Fig 5).

Our results suggest that, in the absence of RecA (or in the absence of “facilitator” proteins required for loading RecA onto its single-stranded DNA substrate), alternate pathways ensure recombination between repeated sequences in *D. radiodurans*. These RecA-independent pathways do not necessarily predominate in *recA*<sup>+</sup> bacteria, although we observed a similar frequency of recombinants in *recA*<sup>+</sup> and  $\Delta recA$  bacteria. Indeed,  $\Delta recA$  (or  $\Delta recF$  or  $\Delta recO$ ) bacteria had a low plating efficiency with less than 10% of cells able to form colonies.

### Does replication slippage account for RecA-independent recombination between chromosomal direct repeats?

In *E. coli*, mutations in components of the DNA Pol III holoenzyme result in elevated levels of tandem repeat rearrangements, supporting the idea that RecA-independent recombination occurs during the process of chromosome replication [14]. A replication slipped misalignment model [14] proposed that a pause in DNA synthesis and dissociation of the polymerase from its template allows the nascent strand to translocate to a new pairing position. Slipped misalignment is thought to occur on single-stranded DNA and thus more frequently during lagging-strand synthesis [14]. The availability of single-stranded DNA on the lagging-strand template, and thus, the length of the Okazaki fragments, might constitute parameters that govern the efficiency of the deletion events and might explain the strong dependence of the deletion frequencies on the proximity of the repeated sequences [14]. Our findings that the distance between the repeats in the 1–11 kb range has no influence on the deletion frequency raise the question as to whether these events were generated through a slipped misalignment mechanism, thus implying the presence of very large single stranded DNA regions on the lagging strand template in *D. radiodurans*. A response to this question awaits better knowledge of the replication machinery in *D. radiodurans* and a determination of the average size of Okazaki fragments in this bacterium.

### Involvement of single strand annealing in RecA-independent recombination between chromosomal direct repeats

We found that the frequencies of the deletion events in  $\Delta recA \Delta ddrB$  (or  $\Delta recO \Delta ddrB$ ) bacteria were reduced 5-fold and 18- to 20-fold as compared with those measured in the single  $\Delta recA$  (or  $\Delta recO$ ) mutant counterparts (Figs 1B and 5) in strains containing repeats separated by 1479 bp and 3,500 to 10,500 bp, respectively. These results strongly suggest that the DdrB protein strongly stimulates RecA-independent recombination in *D. radiodurans*. The DdrB protein was shown to bind single stranded DNA [5] and to mediate *in vitro* fast annealing of complementary oligomers [6]. *In vivo*, the single strand annealing activity of DdrB is supported by its involvement in plasmid establishment during natural transformation [4]. Thus, we propose that RecA-independent recombination between direct repeats occurs mainly through a DdrB-

dependent single strand annealing (SSA) pathway. SSA was first proposed to explain circularization of linear duplex phage DNA containing terminal repetitions by annealing complementary terminal single overhangs [31]. The SSA model was postulated later to take place in eukaryotic cells [32,33] where it is facilitated by RPA and RAD52 in a RAD51-independent manner [34,35]. SSA involves an initial DNA double strand break in the sequence between the duplications followed by the action of a 5' to 3' exonuclease to expose single stranded regions in both repeats that are subsequently aligned and annealed by the RAD52-RPA-ssDNA ternary complex. Annealed intermediates are then processed by digestion of the displaced single stranded DNA, polymerase filling-in and ligation to generate the final recombination product (For review, see [36]).

Although DdrB does not share sequence similarity with the eukaryotic RAD52 protein, it might act as its functional equivalent [37,38]. The activity of the RAD52 protein is strongly stimulated by the presence of RPA [39,40]. In contrast, the single strand annealing activity of DdrB is not stimulated but rather inhibited by inclusion of the SSB protein in the *in vitro* annealing reaction [4,6]. The deinococcal SSB protein is an essential protein and the DdrB protein is unable, even when overexpressed, to replace SSB for cell viability [41]. SSB is crucial for all aspects of DNA metabolism [42] while DdrB seems to have a more specialized role in DNA repair and plasmid transformation by stimulating the SSA pathway. Both DdrB and SSB bind to 3' single stranded tails of resecting ends [5]. The ends can be engaged in two alternative pathways: annealing to complementary ssDNA in the SSA pathway, or, depending on the formation of a RecA nucleofilament, invasion of homologous dsDNA to promote strand exchange in homologous recombination or to prime DNA synthesis in ESDSA. Polymerization of RecA on ssDNA requires the displacement of SSB or DdrB from ssDNA. The SSB protein can be efficiently displaced through the action of RecO and RecR proteins [43,44]. DdrB protein binds more tightly than SSB to ssDNA [5] and might be displaced with more difficulty from ssDNA. We propose that, in *D. radiodurans*, homologous recombination and SSA might also compete for substrate in making deletions between direct repeats. Reams *et al.* [45] proposed that, in *Salmonella enterica*, a single-strand annealing pathway might also be activated to generate duplication between tandem copies of the ribosomal RNA genes (*rnn*) when two single-stranded DNA ends are provided and neither strand is coated with inhibitory RecA protein. Under these conditions, the activation of single-strand annealing might compensate the loss of homologous recombination [45].

### A single strand annealing mechanism is involved in the rescue of stalled replication fork in $\Delta recA$ bacteria

We found that  $\Delta recA$  (or  $\Delta recO$ ) bacteria had a 15 fold decreased plating efficiency as compared with the wild type during exponential growth phase (Fig 4). This important lethal sectoring suggests that problems resulting in the arrest of replication fork (see for review [46]) occur at high frequency in *D. radiodurans*, and that RecA-mediated recombination plays a key role in the recovery of stalled replication forks in this bacterium. A further (2-fold) decreased plating efficiency was observed when a DdrB deficiency was combined with a RecA (or RecO) deficiency (Fig 4). These results are consistent with a single strand annealing model but also with any model that envisions annealing of complementary DNA strands, for example misannealing of the direct repeats during recovery from replication fork collapse in cells devoid of the RecA protein. *D. radiodurans* also seems to be very sensitive to prolonged stationary phase, with a rapid loss of cell viability when proteins involved in homologous recombination were absent, suggesting that DNA double strand breaks were generated in “old” cells and could not be repaired in the absence of RecA or RecO proteins.



## Absence of UvrD increases the frequency of recombination between the repeats

Another important feature was the increased recombination frequency between repeated sequences measured in a *D. radiodurans* mutant devoid of the UvrD protein at a level almost equivalent to those measured after irradiation of wild type bacteria (Fig 6). It was previously shown that *uvrD* mutations enhance tandem repeat deletion in the *E. coli* chromosome [23,47] and stimulate RecA-dependent recombination [21,48,49]. In *E. coli*, mutations in *uvrD* induce the SOS response, a common phenotype in cells with replication defects [50]. The obstacles possibly encountered by replication forks during their progression are multiple, such as tightly bound proteins, nicks or DNA lesions. The Rep helicase acts by dislodging proteins in front of replication forks [51–53] and its absence results in a marked slowing down of replication progression [54], suggesting increased fork arrest. Simultaneous inactivation of Rep and UvrD helicases is lethal in *E. coli* [23] suggesting that UvrD might partially substitute for the Rep protein in ensuring replication progression [55]. In favour of this hypothesis, it was recently shown that UvrD displaces the obstacles downstream of the replisome *in vitro* [52] and plays a major role to displace transcription complexes [56]. Moreover, it was proposed that UvrD acts at blocked replication forks by clearing RecA, facilitating replication fork reversal [57, 58], a hypothesis supported by the ability of UvrD to directly remove RecA nucleoprotein filaments *in vitro* [25].

In *D. radiodurans*, we previously showed that inactivation of *uvrD* results in a marked slowing down of replication progression in un-irradiated cells [3]. During post-irradiation recovery through ESDSA, the absence of UvrD results in a delayed kinetics of DNA double strand break repair that coincided with delayed and less extensive DNA synthesis than that observed in the wild type cells [3]. *D. radiodurans* bacteria are naturally devoid of the RecB and RecC proteins, and it was suggested that UvrD, in association with the RecJ exonuclease, might play an important role in the processing of DNA double strand ends required for priming of DNA synthesis, but also may act in the DNA synthesis elongation step of ESDSA and more generally may play an important role for the progression of replication forks [3]. It is important to notice that we were unable to obtain mutants devoid of the RecJ protein [3], and *recJ* mutants constructed by Hua and his collaborators were shown to grow very slowly and to be thermosensitive [59].

In *D. radiodurans*, we were unable to delete the *recA* gene when bacteria were devoid of the UvrD protein, suggesting lethality of *uvrD* and *recA* deficiencies. These results are reminiscent of phenotypes observed in particular *rad3* mutants of *Saccharomyces cerevisiae*. The RAD3 gene, a homolog of the human gene XPD, encodes a helicase which is a component of the NER apparatus as part of the transcription factor TFIIH. Interestingly *rad3-101* and *rad3-102* mutants accumulate DNA double strand breaks and are lethal when in combination with mutations in recombinational repair genes, strongly suggesting that Rad3 protein influences either the generation of DNA double strand breaks or their processing by homologous recombination [60].

We propose that the absence of UvrD in *D. radiodurans* may disturb the progression of the replication fork, and thus might, as RAD3 in *S. cerevisiae*, influence the generation of DNA double strand break, favouring recombination and also single strand annealing between DNA repeats.

## Induction of recombination between direct repeats by ionizing radiation

We used our assay to analyze the impact of the presence of repeated sequence on the stability of the genome in  $\gamma$ -irradiated cells. We found that exposure to a dose of 5 kGy  $\gamma$ -irradiation increased the recombination level about 10-fold in the wild type but to a lesser extent in cells devoid of the DdrB protein, suggesting that SSA might play an important role in recombination between the duplicated sequences during the process of genome reconstitution.



In *D. radiodurans*, interplasmidic recombination between homologous regions was previously shown to be induced by exposure to  $\gamma$ -radiation [61]. Moreover, when two Tet<sup>S</sup> alleles were inserted on the same chromosome into two randomly distant sites, 2% of Tet<sup>R</sup> bacteria were found among the surviving cells exposed to 17.5 kGy, whereas Tet<sup>R</sup> isolates were only very rarely found without irradiation [62]. Interestingly, when two slightly different *E. coli* plasmids were inserted in the *D. radiodurans* genome generating adjacent duplication insertions, circular derivatives of the tandemly integrated plasmids were formed in the first 1.5 h postirradiation before the onset of *recA*-dependent repair in cells exposed to 17.5 kGy  $\gamma$ -irradiation. These circular derivatives had structures consistent with the hypothesis that DNA repair occurred immediately postirradiation by a *recA*-independent single strand annealing process [63]. These authors proposed that SSA may be a preparatory step for further DNA repair in wild-type *D. radiodurans*, a hypothesis in accordance with our recent results, suggesting that DdrB-dependent single-strand annealing might facilitate the assembly of the myriad of small fragments generated by extreme radiation exposure to generate suitable substrates for subsequent ESDSA-promoted genome reconstitution [4]. Genome reassembly in irradiated *D. radiodurans* cells was considered for a long time as an error-free process since no genome rearrangements were detected after post-irradiation DNA repair. Gross chromosomal rearrangements were detected for the first time in *recA*<sup>+</sup> *D. radiodurans* cells exposed to extremely high  $\gamma$ -doses (25 kGy) and in *recA* mutant cells that survived 5 kGy  $\gamma$ -radiation [64]. The *recA* mutants were also shown to be prone to spontaneous DNA rearrangements during normal exponential growth [64]. These authors presumed that SSA, by pairing ectopic repetitive sequences, may be the main source of these chromosomal rearrangements, a hypothesis reinforced by our results suggesting an important role of SSA in recombination between repeated sequences (this work), in DNA double strand break repair in cells devoid of the RecA protein [4,6], and in early reassembly of small DNA fragments when cells were exposed to high  $\gamma$ -doses [4].

## Conclusion

Altogether, these results suggest that SSA plays a major role in RecA-independent recombination between repeated sequences in the radioresistant *D. radiodurans* bacterium. In un-irradiated wild type bacteria, the deletion events might result, as proposed by Susan Lovett in *E. coli*, from RecA-dependent intermolecular unequal crossing over or intramolecular recombination between the overlapping 5' and 3' regions of the *tetA* gene, and from RecA-independent processes such as replication slippage or template switching [10] or single strand annealing [10,14]. Difficulties in replication can lead to breakage of the fork when replication forks are halted by obstacles or DNA damage in virtually every cell and every cell generation [65,66]. If this occurs in the context of repeated DNA sequences, single-stranded DNA substrates might be generated by resection of the DNA ends, and genetic rearrangements can result through strand-invasion of the broken chromosome with its sister or through SSA at the repeats. Replication of damaged DNA templates can further elevate the probability of fork breakage [67,68]. Moreover, when *D. radiodurans* cells were exposed to a dose of 5 kGy  $\gamma$ -irradiation, generating hundreds DNA double strand breaks, DdrB-dependent SSA and RecA-dependent ESDSA processes involved in DNA double strand break repair increased the opportunities to generate deletion events when DNA repeats are present in the DNA fragments.

## Materials and Methods

### Culture, media

*D. radiodurans* strains were grown at 30°C, 150 rpm in TGY2X (1% tryptone, 0.2% dextrose, 0.6% yeast extract) or plated on TGY1X containing 1.5% agar. *E. coli* strains were grown at

37°C, 150 rpm in Lysogeny Broth (LB). When necessary, media were supplemented with the appropriate antibiotics used at the following final concentrations: kanamycin, 6 µg/mL; chloramphenicol, 3.5 µg/mL; hygromycin, 50 µg/mL; spectinomycin, 75 µg/mL; tetracycline 2.5 µg/mL for *D. radiodurans* and kanamycin, 25 µg/mL or spectinomycin 40 µg/mL for *E. coli*.

## Bacterial strains and plasmids

The bacterial strains and plasmids used in this study are listed in [Table 1](#). The *E. coli* strains used were DH5α as the general cloning host, and SCS110, a *dam dcm* mutant strain, to propagate plasmids prior introduction into *D. radiodurans* via transformation [69]. Transformation of *D. radiodurans* with genomic DNA, PCR products, or plasmid DNA was performed as described [70]. All *D. radiodurans* strains were derivatives of strain R1 ATCC 13939. The genetic structure and the purity of the mutant strains were checked by PCR. Oligonucleotides used for strain constructions and diagnostic PCR will be provided on request.

**Construction of tester strains for recombination assays.** The strain GY12947 was constructed by the integration of the *tetA* gene into the dispensable *amyE* (DR\_1472) gene by transformation of GY9613 (ATCC 13939 R1 strain) by the tripartite ligation product containing the 5' and 3' parts of *amyE* and the *tetA* gene amplified by PCR using GY9613 genomic DNA and plasmid p11615 as template, respectively.

GY12947 was then used to amplify the 778 bp of the 5' part (called 5'*tetA*) and the 850 bp of the 3' part (called 3'*tetA*) of the coding region of the 1,190 bp *tetA* gene. The 5'*tetA* and 3'*tetA* fragments contain 438 bp overlapping sequences. Tripartite ligation products containing the 5'*tetA* and 3'*tetA* fragments separated by spacers of 1,479, 3,500 or 4,500 bp containing a *spec* gene amplified by PCR from plasmid p11554 were used to transform GY12947 giving rise to GY12949, GY16209, GY16211, respectively. Independent clones were saved for each strain and constructions were verified by DNA sequencing. Mutations generated during PCR amplification of 5'*tetA* using GY12947 as template were detected in the 438 bp overlapping sequence of the 5'*tetA* in two clones of GY12949 and the strains containing mutations in the 5'*tetA* overlapping region were renamed GY12948 (3 mutations) and GY12950 (1 mutation).

Strains with larger spacers between the *tetA* overlapping regions were obtained by transformation of GY16209 and GY16211 with a tripartite ligation product of a 3,000 or 6,000 bp PCR fragment containing the *hph* gene amplified from plasmid p15070, and 5' and 3' regions of the *spec* gene amplified by PCR from GY12949 yielding GY16227 containing a 6,500 bp spacer and GY16235 containing a 10,500 bp spacer, respectively. The right integration of spacers, and the purity of the strains were checked by PCR. The 5'*tetA*, the 3'*tetA* and the intervening sequences were checked by DNA sequencing.

For the recombination assays between chromosomal and plasmid DNA, strain GY15102, in which the 5' region of the *tetA* gene (5'*tetA*) and an *hph* cassette were inserted in the *amyE* gene, was transformed by the plasmid p15002 obtained by cloning in plasmid p11554 of the 3'*tetA* region to give rise to strain GY15147. Plasmid and chromosomal DNA contained the same 438 bp homologous sequences as those present in the genomic DNA of strains used for measurement of inter- or intra-chromosomal recombination.

Deletion mutant derivatives of all the recombination tester strains were obtained by transformation of the tester strains with genomic DNA of  $\Delta recA$ ,  $\Delta mutS$ ,  $\Delta uvrD$ ,  $\Delta recF$ ,  $\Delta recO$ ,  $\Delta ddrB$ ,  $\Delta radA$  derivatives of R1 strain, available in the laboratory or constructed by the tripartite ligation method [71]. The  $\Delta recA\Delta radA$ ,  $\Delta recA\Delta mutS$ ,  $\Delta recA\Delta ddrB$ ,  $\Delta recO\Delta ddrB$  double mutants were obtained by transformation of the single  $\Delta radA$ ,  $\Delta mutS$  or  $\Delta ddrB$  mutants by genomic DNA of  $\Delta recA$  or  $\Delta recO$  bacteria.  $\Delta uvrD$  bacteria were also transformed by genomic DNA of  $\Delta recA$ ,  $\Delta recF$  and  $\Delta recR$  bacteria. All strains were extensively purified on selective

**Table 1. Bacterial strains and plasmids.**

| Bacterial strains            | Description                                                                                      | Source or reference |
|------------------------------|--------------------------------------------------------------------------------------------------|---------------------|
| <b><i>E. coli</i></b>        |                                                                                                  |                     |
| DH5 $\alpha$                 | <i>supE44 ΔlacU169 (φ80lacZΔM15) hsdR17 recA1endA1 gyrA96 thi-1 relA1</i>                        | Laboratory stock    |
| SCS110                       | <i>endA dam dcm supE44Δ(lac-proAB) (F'- traD36 proABlacI<sup>r</sup>ZΔM15)</i>                   | Laboratory stock    |
| <b><i>D. radiodurans</i></b> |                                                                                                  |                     |
| GY9613                       | R1 ATCC 13939                                                                                    | Laboratory stock    |
| GY12958                      | as R1 but $\Delta radA\Omega cat$                                                                | This work           |
| GY12965                      | as R1 but $\Delta recF\Omega cat$                                                                | [3]                 |
| GY12966                      | as R1 but $\Delta recO\Omega hph$                                                                | [3]                 |
| GY12967                      | as R1 but $\Delta recR\Omega cat$                                                                | [3]                 |
| GY12968                      | as R1 but $\Delta recA\Omega kan$                                                                | [3]                 |
| GY12977                      | as R1 but $\Delta mutS1\Omega cat$                                                               | This work           |
| GY13915                      | as R1 but $\Delta ddrB\Omega cat$                                                                | This work           |
| GY15123                      | as R1 but $\Delta uvrD\Omega kan$                                                                | This work           |
| GY15125                      | as R1 but $\Delta recO\Omega kan$                                                                | This work           |
| GY15180                      | as R1 but $\Delta recA\Omega cat$                                                                | This work           |
| GY16004                      | as R1 but $\Delta uvrD\Omega cat$                                                                | This work           |
| GY16262                      | as R1 but $\Delta recO03A9cat$                                                                   | This work           |
| GY16626                      | as GY13915 but $\Delta recA\Omega kan$                                                           | This work           |
| GY16636                      | as GY13915 but $\Delta recO\Omega kan$                                                           | This work           |
| GY12947                      | <i>amyE'::P<sub>groE</sub>::tetA::'amyE</i>                                                      | This work           |
| GY12949 <sup>(a)</sup>       | <i>amyE':: (P<sub>groE</sub>:: 5'tetA::P<sub>out</sub>:: spc<sub>1,479</sub>::3'tetA)::'amyE</i> | This work           |
| GY15184                      | as GY12949 $\Delta recA\Omega cat$                                                               | This work           |
| GY12956                      | as GY12949 but $\Delta radA\Omega cat$                                                           | This work           |
| GY12971                      | as GY12956 but $\Delta recA\Omega kan$                                                           | This work           |
| GY12978                      | as GY12949 but $\Delta mutS1\Omega cat$                                                          | This work           |
| GY16620                      | as GY12978 but $\Delta recA\Omega kan$                                                           | This work           |
| GY12950 <sup>(b)</sup>       | as GY12949 but 1 mutation C420T in 5' tetA'                                                      | This work           |
| GY12980                      | as GY12950 but $\Delta mutS1\Omega cat$                                                          | This work           |
| GY16624                      | as GY12950 but $\Delta recA\Omega kan$                                                           | This work           |
| GY16618                      | as GY12980 but $\Delta recA\Omega kan$                                                           | This work           |
| GY12948 <sup>(b)</sup>       | as GY12949 but 3 mutations G410A, A620G, delA767 in tetA'                                        | This work           |
| GY12979                      | as GY12948 but $\Delta mutS1\Omega cat$                                                          | This work           |
| GY16622                      | as GY12948 but $\Delta recA\Omega kan$                                                           | This work           |
| GY16616                      | as GY12979 but $\Delta recA\Omega kan$                                                           | This work           |
| GY12963                      | as GY12949 but $\Delta recO\Omega hph$                                                           | This work           |
| GY12955                      | as GY12949 but $\Delta recF\Omega cat$                                                           | This work           |
| GY12953                      | as GY12949 but $\Delta uvrD\Omega cat$                                                           | This work           |
| GY16016                      | as GY12949 but $\Delta ddrB\Omega cat$                                                           | This work           |
| GY16628                      | as GY16016 but $\Delta recA\Omega kan$                                                           | This work           |
| GY16638                      | as GY16016 but $\Delta recO\Omega kan$                                                           | This work           |
| GY16209 <sup>(a)</sup>       | <i>amyE':: (P<sub>groE</sub>:: 5'tetA::P<sub>out</sub>:: spc<sub>3,500</sub>::3'tetA)::'amyE</i> | This work           |
| GY16238                      | as GY16209 but $\Delta recA\Omega cat$                                                           | This work           |
| GY16264                      | as GY16209 but $\Delta recF\Omega cat$                                                           | This work           |
| GY16262                      | as GY16209 but $\Delta recO\Omega cat$                                                           | This work           |
| GY16608                      | as GY16209 but $\Delta uvrD\Omega cat$                                                           | This work           |
| GY16268                      | as GY16209 but $\Delta ddrB\Omega cat$                                                           | This work           |

(Continued)

Table 1. (Continued)

| Bacterial strains      | Description                                                                                                                                              | Source or reference |
|------------------------|----------------------------------------------------------------------------------------------------------------------------------------------------------|---------------------|
| GY16630                | as GY16268 but $\Delta recA\Omega kan$                                                                                                                   | This work           |
| GY16640                | as GY16628 but $\Delta recO\Omega kan$                                                                                                                   | This work           |
| GY16227 <sup>(a)</sup> | <i>amyE</i> ::(P <sub>groE</sub> ::5'tetA::P <sub>out</sub> :: <i>spc</i> <sub>3,500</sub> :: <i>hph</i> <sub>3000</sub> ::3'tetA):: <i>amyE</i>         | This work           |
| GY16244                | as GY16227 but $\Delta recA\Omega cat$                                                                                                                   | This work           |
| GY16276                | as GY16227 but $\Delta recF\Omega cat$                                                                                                                   | This work           |
| GY16278                | as GY16227 but $\Delta recO\Omega cat$                                                                                                                   | This work           |
| GY16612                | as GY16227 but $\Delta uvrD\Omega cat$                                                                                                                   | This work           |
| GY16282                | as GY16227 but $\Delta ddrB\Omega cat$                                                                                                                   | This work           |
| GY16632                | as GY16282 but $\Delta recA\Omega kan$                                                                                                                   | This work           |
| GY16642                | as GY16282 but $\Delta recO\Omega kan$                                                                                                                   | This work           |
| GY16211 <sup>(a)</sup> | <i>amyE</i> ::(P <sub>groE</sub> ::5'tetA::P <sub>out</sub> :: <i>spc</i> <sub>4,500</sub> ::3'tetA):: <i>amyE</i>                                       | This work           |
| GY16235 <sup>(a)</sup> | <i>amyE</i> ::(P <sub>groE</sub> ::5'tetA::P <sub>out</sub> :: <i>spc</i> <sub>4,500</sub> :: <i>hph</i> <sub>6000</sub> ::3'tetA):: <i>amyE</i>         | This work           |
| GY16252                | as GY16235 but $\Delta recA\Omega cat$                                                                                                                   | This work           |
| GY16292                | as GY16235 but $\Delta recF\Omega cat$                                                                                                                   | This work           |
| GY16290                | as GY16235 but $\Delta recO\Omega cat$                                                                                                                   | This work           |
| GY16614                | as GY16235 but $\Delta uvrD\Omega cat$                                                                                                                   | This work           |
| GY16296                | as GY16235 but $\Delta ddrB\Omega cat$                                                                                                                   | This work           |
| GY16634                | as GY16296 but $\Delta recA\Omega kan$                                                                                                                   | This work           |
| GY16644                | as GY16296 but $\Delta recO\Omega kan$                                                                                                                   | This work           |
| GY15102 <sup>(a)</sup> | <i>amyE</i> ::(P <sub>groE</sub> ::5'tetA::P <sub>kat</sub> :: <i>hph</i> ):: <i>amyE</i>                                                                | This work           |
| GY15147                | GY15102 (p15002)                                                                                                                                         | This work           |
| GY15149                | as GY15147 but $\Delta radA\Omega cat$                                                                                                                   | This work           |
| GY15156                | as GY15147 but $\Delta uvrD\Omega kan$                                                                                                                   | This work           |
| GY15158                | as GY15147 but $\Delta recA\Omega cat$                                                                                                                   | This work           |
| GY15160                | as GY15147 but $\Delta recF\Omega cat$                                                                                                                   | This work           |
| <b>Plasmids</b>        |                                                                                                                                                          |                     |
| p11615                 | Source of <i>tetA</i> cassette in <i>D. radiodurans</i>                                                                                                  | [71]                |
| p11086                 | Source of <i>kan</i> cassette in <i>D. radiodurans</i>                                                                                                   | Laboratory stock    |
| p11520                 | Shuttle vector <i>E. coli</i> / <i>D. radiodurans</i> , <i>spec</i>                                                                                      | [72]                |
| p11554                 | Deletion of the <i>cat</i> gene in p11520, shuttle vector <i>E. coli</i> / <i>D. radiodurans</i> , <i>spec</i>                                           | Laboratory stock    |
| p13025                 | pUC18 derivative encoding <i>lacZ</i>                                                                                                                    | [73]                |
| p12625                 | pUC19 containing <i>hph</i> and <i>D. radiodurans katA</i> promoter (alias pKatHPH4)                                                                     | [74]                |
| p15002 <sup>(a)</sup>  | 3'tetA inserted in p11554 between <i>StuI</i> and <i>BamHI</i> restriction sites                                                                         | This work           |
| P15070                 | Insertion between <i>HindIII</i> and <i>XbaI</i> sites of p13025 of a PCR fragment containing the <i>P<sub>kat</sub>::hph</i> gene amplified from p12625 | This work           |

<sup>(a)</sup> 5'tetA and the 3'tetA contain the 1–779 and the 342–1190 part of the *tetA* coding region, respectively. They contain a 342–779 overlapping region. The positions are numbered relatively to the first base of the initiation codon of *tetA*.

<sup>(b)</sup> The positions of the mutations in the 5'tetA fragment are numbered relatively to the first base of the initiation codon of *tetA*.

doi:10.1371/journal.pgen.1005636.t001

medium to obtain homogenotization of the deletions before to be checked by PCR for their purity. Attempts to obtain homogenotes containing the  $\Delta uvrD\Delta recA$  allele, the  $\Delta uvrD\Delta recF$  allele and the  $\Delta uvrD\Delta recR$  allele on each of the multiple genomic copies present in *D. radiodurans* were unsuccessful, even after extensive purification on selective plates (see [Results](#) section).

## Inter- or intra-chromosomal recombination

Cells were plated on TGY agar and incubated at 30°C for 3 days, or 5 days for  $\Delta recA$ ,  $\Delta recO$  and  $\Delta recF$  mutant bacteria and 7 days for double mutant  $\Delta ddrB \Delta recA$  and  $\Delta ddrB \Delta recO$  bacteria. Three to six colonies per strain were inoculated in 3 mL of TGY2X and incubated at 30°C, 150 rpm. Appropriate dilutions of the bacterial cultures, grown to  $OD_{650nm} = 1.5$  were plated on TGY and TGY + tetracycline 2.5  $\mu\text{g}/\text{mL}$ . Colonies were counted after 4 to 7 days of incubation at 30°C. The experiments were repeated at least three times, using, when possible, strain isolates obtained independently during the strain constructions.

To measure recombination between repeated sequences after  $\gamma$ -irradiation, bacterial strains were treated as previously described upstream, except that bacterial cultures were grown to an  $OD_{650nm} = 0.5$  before being concentrated by centrifugation in TGY2X to an  $OD_{650nm} = 10$  and irradiated on ice at a dose of 5 kGy with a  $^{60}\text{Co}$  irradiation system (LABRA, CEA, Saclay) at a dose rate of 100 Gy/min. Following irradiation, samples of 100  $\mu\text{L}$  were inoculated in 4.9 mL of TGY2X and incubated at 30°C, 150 rpm. After 20 hours of post-irradiation incubation, appropriate dilutions of bacterial culture were plated on TGY and TGY + tetracycline 2.5  $\mu\text{g}/\text{mL}$ . Colonies were counted after 4–7 days of incubation at 30°C. Unirradiated controls were treated as irradiated cells, except that they were maintained on ice without irradiation during the period when the irradiated cells were exposed to  $\gamma$ -rays.

## Recombination between chromosomal and plasmid DNA

Cells containing plasmid p15002 were plated on TGY agar + spectinomycin (75  $\mu\text{g}/\text{mL}$ ) and incubated at 30°C during 3 days (or 5 days for  $\Delta recA$  and  $\Delta recF$  bacteria). Three colonies per strain were inoculated in 3 mL of TGY2X + spectinomycin (75  $\mu\text{g}/\text{mL}$ ) and incubated at 30°C, 150 rpm. Appropriate dilutions of the bacterial cultures grown to  $OD_{650nm} = 1.5$  were plated on TGY and TGY+ tetracycline 2.5  $\mu\text{g}/\text{mL}$ . Colonies were counted after 4 to 7 days of incubation at 30°C.

## Growth rate and lethal sectoring of $\Delta ddrB \Delta recA$ and $\Delta ddrB \Delta recO$ double mutants

Strains were streaked on TGY plates supplemented with the appropriate antibiotics. Independent colonies were inoculated in 3 mL TGY2X supplemented with the appropriate antibiotics (only kanamycin for double mutants) and grown at 30°C to an  $OD_{650nm} = 1.5$ . Cultures were then diluted 200 to 5,000 fold and grown overnight at 30°C to an  $OD_{650nm} = 0.1$  (time 0 of the growth curves). Then, the  $OD_{650nm}$  was measured and appropriate dilutions were plated on TGY plates at different times during 80 h of incubation at 30°C with agitation (150 rpm). Colonies were counted after 3 (WT or  $\Delta ddrB$  bacteria), 5 ( $\Delta recA$  or  $\Delta recO$  bacteria) or 7 days ( $\Delta ddrB \Delta recA$  or  $\Delta ddrB \Delta recO$  bacteria) of incubation at 30°C.

## Statistical analysis

In Figs 1 and 3 and 5, in order to establish the statistical differences between the [Tet<sup>R</sup>] frequencies measured in mutant and WT strains, non parametric Dunn's multiple comparison test [75] were used, taking into account the p-value correction and performed with the GraphPad Prism6 software. All the comparisons were bi-sided.

Linear regressions and the slope significances observed in S2 Fig were estimated using the GraphPad Prism6 software.

In Fig 6, statistically significant differences between the irradiated and the non-irradiated conditions were calculated by non-parametric Mann-Whitney tests performed in GraphPad Prism 6 software.

## Supporting Information

**S1 Fig. Integration of plasmid DNA in chromosomal DNA verified by PCR in [Tet<sup>R</sup>] bacteria.** **A.** Schematic representation of the position of the primer pairs a and b, a and d, c and d, and e and f, used to test the integration of the plasmid in chromosomal DNA **B.** GY15147 bacteria containing a 5' *tetA* region inserted in the *amyE* gene and a 3' *tetA* region carried by plasmid p15002 were plated on TGY-Agar plates with or without tetracycline. The genomic DNA of 3 independent [Tet<sup>R</sup>] colonies picked and purified on TGY-Agar plates containing 2.5 µg / mL tetracycline and 1 [Tet<sup>S</sup>] colony picked on TGY-Agar plates was purified and used as templates to verify by PCR the integration of the plasmid using the primers pairs described in S1A. Purified p15002 plasmid DNA and genomic DNA of strain GY15102 that does not contain plasmid p15002 were used as controls. PCR fragment sizes are presented for each DNA template. The fragment of 9812 bp was not amplified under the conditions we used for PCR amplification. (PDF)

**S2 Fig. Linear regression models of the evolution of the [Tet<sup>R</sup>] bacteria frequencies as a function of the number of base pair changes in one of the repeat in WT,  $\Delta recA$ ,  $\Delta mutS$  and  $\Delta mut \Delta recA$  strains.** (PDF)

**S3 Fig. Non-homogenotization of  $\Delta recA$ ,  $\Delta recF$  and  $\Delta recR$  deletions in  $\Delta uvrD$  bacteria.** **A.** Diagnostic PCRs for the deletion of *recA* and *uvrD* genes. **B.** Diagnostic PCRs for the deletion of *recF* and *uvrD* genes. **C.** Diagnostic PCRs for the deletion of *recR* and *uvrD* genes. Schematic allelic replacement, primers and PCR fragment sizes are represented for each gene. (PDF)

**S4 Fig. Homogenotization of  $\Delta recA$  and  $\Delta recO$  deletions in  $\Delta ddrB$  bacteria.** **A.** Diagnostic PCRs for the deletion of *recA* and *ddrB* genes. **B.** Diagnostic PCRs for the deletion of *recO* and *ddrB* genes. Schematic allelic replacement, primers and PCR fragment sizes are represented for each gene. (PDF)

## Acknowledgments

We thank Adriana Bailone for valuable discussions, suggestions and critical reading of the manuscript, and Michael DuBow for polishing our English. We thank the Institut Curie for the use of the <sup>137</sup>Cs irradiation system.

## Author Contributions

Conceived and designed the experiments: SI EB PS SS. Performed the experiments: SI EB GC PS. Analyzed the data: SI EB BB PS SS. Contributed reagents/materials/analysis tools: SI EB GC BB PS SS. Wrote the paper: SI EB BB PS SS.

## References

1. Zahradka K, Slade D, Bailone A, Sommer S, Averbek D, et al. (2006) Reassembly of shattered chromosomes in *Deinococcus radiodurans*. *Nature* 443: 569–573. PMID: [17006450](#)
2. Slade D, Lindner AB, Paul G, Radman M (2009) Recombination and replication in DNA repair of heavily irradiated *Deinococcus radiodurans*. *Cell* 136: 1044–1055. doi: [10.1016/j.cell.2009.01.018](#) PMID: [19303848](#)
3. Bentschikou E, Servant P, Coste G, Sommer S (2010) A major role of the RecFOR pathway in DNA double-strand-break repair through ESDSA in *Deinococcus radiodurans*. *PLoS Genet* 6: e1000774. doi: [10.1371/journal.pgen.1000774](#) PMID: [20090937](#)



4. Bouthier de la Tour C, Boissard S, Norais C, Toueille M, Bentchikou E, et al. (2011) The deinococcal DdrB protein is involved in an early step of DNA double strand break repair and in plasmid transformation through its single-strand annealing activity. *DNA Repair (Amst)* 10: 1223–1231.
5. Norais CA, Chitteni-Pattu S, Wood EA, Inman RB, Cox MM (2009) An alternative *Deinococcus radiodurans* SSB induced by ionizing radiation: The DdrB protein. *J Biol Chem*.
6. Xu G, Lu H, Wang L, Chen H, Xu Z, et al. (2010) DdrB stimulates single-stranded DNA annealing and facilitates RecA-independent DNA repair in *Deinococcus radiodurans*. *DNA Repair (Amst)* 9: 805–812.
7. Mazin AV, Kuzminov AV, Dianov GL, Salganik RI (1991) Mechanisms of deletion formation in *Escherichia coli* plasmids. II. Deletions mediated by short direct repeats. *Mol Gen Genet* 228: 209–214. PMID: [1679526](#)
8. Dianov GL, Kuzminov AV, Mazin AV, Salganik RI (1991) Molecular mechanisms of deletion formation in *Escherichia coli* plasmids. I. Deletion formation mediated by long direct repeats. *Mol Gen Genet* 228: 153–159. PMID: [1679524](#)
9. Bi X, Liu LF (1994) *recA*-independent and *recA*-dependent intramolecular plasmid recombination. Differential homology requirement and distance effect. *J Mol Biol* 235: 414–423. PMID: [8289271](#)
10. Lovett ST, Gluckman TJ, Simon PJ, Sutera VA Jr., Drapkin PT (1994) Recombination between repeats in *Escherichia coli* by a *recA*-independent, proximity-sensitive mechanism. *Mol Gen Genet* 245: 294–300. PMID: [7816039](#)
11. Bierne H, Vilette D, Ehrlich SD, Michel B (1997) Isolation of a *dnaE* mutation which enhances RecA-independent homologous recombination in the *Escherichia coli* chromosome. *Mol Microbiol* 24: 1225–1234. PMID: [9218771](#)
12. Saveson CJ, Lovett ST (1997) Enhanced deletion formation by aberrant DNA replication in *Escherichia coli*. *Genetics* 146: 457–470. PMID: [9177997](#)
13. Saveson CJ, Lovett ST (1999) Tandem repeat recombination induced by replication fork defects in *Escherichia coli* requires a novel factor, RadC. *Genetics* 152: 5–13. PMID: [10224240](#)
14. Michel B (2000) Replication fork arrest and DNA recombination. *Trends Biochem Sci* 25: 173–178. PMID: [10754549](#)
15. Lovett ST (2004) Encoded errors: mutations and rearrangements mediated by misalignment at repetitive DNA sequences. *Mol Microbiol* 52: 1243–1253. PMID: [15165229](#)
16. Bzymek M, Lovett ST (2001) Evidence for two mechanisms of palindrome-stimulated deletion in *Escherichia coli*: single-strand annealing and replication slipped mispairing. *Genetics* 158: 527–540. PMID: [11404319](#)
17. Nguyen HH, de la Tour CB, Toueille M, Vannier F, Sommer S, et al. (2009) The essential histone-like protein HU plays a major role in *Deinococcus radiodurans* nucleoid compaction. *Mol Microbiol* 73: 240–252. doi: [10.1111/j.1365-2958.2009.06766.x](#) PMID: [19570109](#)
18. Meima R, Lidstrom ME (2000) Characterization of the minimal replicon of a cryptic *Deinococcus radiodurans* SARK plasmid and development of versatile *Escherichia coli*-*D. radiodurans* shuttle vectors. *Appl Environ Microbiol* 66: 3856–3867. PMID: [10966401](#)
19. Beam CE, Saveson CJ, Lovett ST (2002) Role for *radA/sms* in recombination intermediate processing in *Escherichia coli*. *J Bacteriol* 184: 6836–6844. PMID: [12446634](#)
20. Cooper DL, Boyle DC, Lovett ST (2015) Genetic analysis of *Escherichia coli* RadA: functional motifs and genetic interactions. *Mol Microbiol* 95: 769–779. doi: [10.1111/mmi.12899](#) PMID: [25484163](#)
21. Konrad EB (1977) Method for the isolation of *Escherichia coli* mutants with enhanced recombination between chromosomal duplications. *J Bacteriol* 130: 167–172. PMID: [323226](#)
22. Feinstein SI, Low KB (1986) Hyper-recombining recipient strains in bacterial conjugation. *Genetics* 113: 13–33. PMID: [3519362](#)
23. Washburn BK, Kushner SR (1991) Construction and analysis of deletions in the structural gene (*uvrD*) for DNA helicase II of *Escherichia coli*. *J Bacteriol* 173: 2569–2575. PMID: [1849510](#)
24. Morel P, Hejna JA, Ehrlich SD, Cassuto E (1993) Antipairing and strand transferase activities of *E. coli* helicase II (*UvrD*). *Nucleic Acids Res* 21: 3205–3209. PMID: [8341594](#)
25. Veaute X, Delmas S, Selva M, Jeusset J, Le Cam E, et al. (2005) *UvrD* helicase, unlike Rep helicase, dismantles RecA nucleoprotein filaments in *Escherichia coli*. *EMBO J* 24: 180–189. PMID: [15565170](#)
26. Cox MM, Battista JR (2005) *Deinococcus radiodurans*—the consummate survivor. *Nat Rev Microbiol* 3: 882–892. PMID: [16261171](#)
27. Treangen TJ, Abraham AL, Touchon M, Rocha EP (2009) Genesis, effects and fates of repeats in prokaryotic genomes. *FEMS Microbiol Rev* 33: 539–571. PMID: [19396957](#)
28. Makarova KS, Aravind L, Wolf YI, Tatusov RL, Minton KW, et al. (2001) Genome of the extremely radiation-resistant bacterium *Deinococcus radiodurans* viewed from the perspective of comparative genomics. *Microbiol Mol Biol Rev* 65: 44–79. PMID: [11238985](#)



29. Marsin S, Mathieu A, Kortulewski T, Guerois R, Radicella JP (2008) Unveiling novel RecO distant orthologues involved in homologous recombination. *PLoS Genet* 4: e1000146. doi: [10.1371/journal.pgen.1000146](https://doi.org/10.1371/journal.pgen.1000146) PMID: [18670631](https://pubmed.ncbi.nlm.nih.gov/18670631/)
30. Bruand C, Bidnenko V, Ehrlich SD (2001) Replication mutations differentially enhance RecA-dependent and RecA-independent recombination between tandem repeats in *Bacillus subtilis*. *Mol Microbiol* 39: 1248–1258. PMID: [11251841](https://pubmed.ncbi.nlm.nih.gov/11251841/)
31. Thomas CA (1967) The recombination of DNA molecules. In: press TRU, editor. *The Neurosciences A study program*. New York. pp. 162–182.
32. Lin FL, Sperle K, Sternberg N (1984) Model for homologous recombination during transfer of DNA into mouse L cells: role for DNA ends in the recombination process. *Mol Cell Biol* 4: 1020–1034. PMID: [6330525](https://pubmed.ncbi.nlm.nih.gov/6330525/)
33. Mezard C, Nicolas A (1994) Homologous, homeologous, and illegitimate repair of double-strand breaks during transformation of a wild-type strain and a rad52 mutant strain of *Saccharomyces cerevisiae*. *Mol Cell Biol* 14: 1278–1292. PMID: [8289807](https://pubmed.ncbi.nlm.nih.gov/8289807/)
34. Grimme JM, Honda M, Wright R, Okuno Y, Rothenberg E, et al. (2010) Human Rad52 binds and wraps single-stranded DNA and mediates annealing via two hRad52-ssDNA complexes. *Nucleic Acids Res* 38: 2917–2930. doi: [10.1093/nar/gkp1249](https://doi.org/10.1093/nar/gkp1249) PMID: [20081207](https://pubmed.ncbi.nlm.nih.gov/20081207/)
35. Rothenberg E, Grimme JM, Spies M, Ha T (2008) Human Rad52-mediated homology search and annealing occurs by continuous interactions between overlapping nucleoprotein complexes. *Proc Natl Acad Sci U S A* 105: 20274–20279. doi: [10.1073/pnas.0810317106](https://doi.org/10.1073/pnas.0810317106) PMID: [19074292](https://pubmed.ncbi.nlm.nih.gov/19074292/)
36. Paques F, Haber JE (1999) Multiple pathways of recombination induced by double-strand breaks in *Saccharomyces cerevisiae*. *Microbiol Mol Biol Rev* 63: 349–404. PMID: [10357855](https://pubmed.ncbi.nlm.nih.gov/10357855/)
37. Sugiman-Marangos S, Junop MS (2010) The structure of DdrB from *Deinococcus*: a new fold for single-stranded DNA binding proteins. *Nucleic Acids Res* 38: 3432–3440. doi: [10.1093/nar/gkq036](https://doi.org/10.1093/nar/gkq036) PMID: [20129942](https://pubmed.ncbi.nlm.nih.gov/20129942/)
38. Sugiman-Marangos SN, Peel JK, Weiss YM, Ghirlando R, Junop MS (2013) Crystal structure of the DdrB/ssDNA complex from *Deinococcus radiodurans* reveals a DNA binding surface involving higher-order oligomeric states. *Nucleic Acids Res* 41: 9934–9944. doi: [10.1093/nar/gkt759](https://doi.org/10.1093/nar/gkt759) PMID: [23975200](https://pubmed.ncbi.nlm.nih.gov/23975200/)
39. Shinohara A, Shinohara M, Ohta T, Matsuda S, Ogawa T (1998) Rad52 forms ring structures and cooperates with RPA in single-strand DNA annealing. *Genes Cells* 3: 145–156. PMID: [9619627](https://pubmed.ncbi.nlm.nih.gov/9619627/)
40. Sugiyama T, New JH, Kowalczykowski SC (1998) DNA annealing by RAD52 protein is stimulated by specific interaction with the complex of replication protein A and single-stranded DNA. *Proc Natl Acad Sci U S A* 95: 6049–6054. PMID: [9600915](https://pubmed.ncbi.nlm.nih.gov/9600915/)
41. Lockhart JS, DeVeaux LC (2013) The essential role of the *Deinococcus radiodurans* *ssb* gene in cell survival and radiation tolerance. *PLoS One* 8: e71651. doi: [10.1371/journal.pone.0071651](https://doi.org/10.1371/journal.pone.0071651) PMID: [23951213](https://pubmed.ncbi.nlm.nih.gov/23951213/)
42. Shereda RD, Kozlov AG, Lohman TM, Cox MM, Keck JL (2008) SSB as an organizer/mobilizer of genome maintenance complexes. *Crit Rev Biochem Mol Biol* 43: 289–318. doi: [10.1080/10409230802341296](https://doi.org/10.1080/10409230802341296) PMID: [18937104](https://pubmed.ncbi.nlm.nih.gov/18937104/)
43. Inoue J, Honda M, Ikawa S, Shibata T, Mikawa T (2008) The process of displacing the single-stranded DNA-binding protein from single-stranded DNA by RecO and RecR proteins. *Nucleic Acids Res* 36: 94–109. PMID: [18000001](https://pubmed.ncbi.nlm.nih.gov/18000001/)
44. Hobbs MD, Sakai A, Cox MM (2007) SSB protein limits RecOR binding onto single-stranded DNA. *J Biol Chem* 282: 11058–11067. PMID: [17272275](https://pubmed.ncbi.nlm.nih.gov/17272275/)
45. Reams AB, Kofoed E, Duleba N, Roth JR (2014) Recombination and annealing pathways compete for substrates in making *rrm* duplications in *Salmonella enterica*. *Genetics* 196: 119–135. doi: [10.1534/genetics.113.158519](https://doi.org/10.1534/genetics.113.158519) PMID: [24214339](https://pubmed.ncbi.nlm.nih.gov/24214339/)
46. Atkinson J, McGlynn P (2009) Replication fork reversal and the maintenance of genome stability. *Nucleic Acids Res* 37: 3475–3492. doi: [10.1093/nar/gkp244](https://doi.org/10.1093/nar/gkp244) PMID: [19406929](https://pubmed.ncbi.nlm.nih.gov/19406929/)
47. Bierne H, Seigneur M, Ehrlich SD, Michel B (1997) *uvrD* mutations enhance tandem repeat deletion in the *Escherichia coli* chromosome via SOS induction of the RecF recombination pathway. *Mol Microbiol* 26: 557–567. PMID: [9402025](https://pubmed.ncbi.nlm.nih.gov/9402025/)
48. Zieg J, Maples VF, Kushner SR (1978) Recombinant levels of *Escherichia coli* K-12 mutants deficient in various replication, recombination, or repair genes. *J Bacteriol* 134: 958–966. PMID: [350859](https://pubmed.ncbi.nlm.nih.gov/350859/)
49. Arthur HM, Lloyd RG (1980) Hyper-recombination in *uvrD* mutants of *Escherichia coli* K-12. *Mol Gen Genet* 180: 185–191. PMID: [7003307](https://pubmed.ncbi.nlm.nih.gov/7003307/)
50. Ossanna N, Mount DW (1989) Mutations in *uvrD* induce the SOS response in *Escherichia coli*. *J Bacteriol* 171: 303–307. PMID: [2536658](https://pubmed.ncbi.nlm.nih.gov/2536658/)

51. Yancey-Wrona JE, Wood ER, George JW, Smith KR, Matson SW (1992) *Escherichia coli* Rep protein and helicase IV. Distributive single-stranded DNA-dependent ATPases that catalyze a limited unwinding reaction *in vitro*. *Eur J Biochem* 207: 479–485. PMID: [1321715](#)
52. Guy CP, Atkinson J, Gupta MK, Mahdi AA, Gwynn EJ, et al. (2009) Rep provides a second motor at the replisome to promote duplication of protein-bound DNA. *Mol Cell* 36: 654–666. doi: [10.1016/j.molcel.2009.11.009](#) PMID: [19941825](#)
53. Atkinson J, Gupta MK, McGlynn P (2011) Interaction of Rep and DnaB on DNA. *Nucleic Acids Res* 39: 1351–1359. doi: [10.1093/nar/gkq975](#) PMID: [20959294](#)
54. Lane HE, Denhardt DT (1975) The *rep* mutation. IV. Slower movement of replication forks in *Escherichia coli rep* strains. *J Mol Biol* 97: 99–112. PMID: [1100854](#)
55. Taucher-Sholz G, Abdel-Monem M, Hoffman-Berling H (1983) Function of DNA helicases in *E. coli*. In: Cozarelli NR, editor. Mechanisms of DNA replication and recombination: Alan, R. Liss, Inc., New York. pp. 65–76.
56. Boubakri H, de Septenville AL, Viguera E, Michel B (2010) The helicases DinG, Rep and UvrD cooperate to promote replication across transcription units *in vivo*. *EMBO J* 29: 145–157. doi: [10.1038/emboj.2009.308](#) PMID: [19851282](#)
57. Flores MJ, Bidnenko V, Michel B (2004) The DNA repair helicase UvrD is essential for replication fork reversal in replication mutants. *EMBO Rep* 5: 983–988. PMID: [15375374](#)
58. Flores MJ, Sanchez N, Michel B (2005) A fork-clearing role for UvrD. *Mol Microbiol* 57: 1664–1675. PMID: [16135232](#)
59. Jiao J, Wang L, Xia W, Li M, Sun H, et al. (2012) Function and biochemical characterization of RecJ in *Deinococcus radiodurans*. *DNA Repair (Amst)* 11: 349–356.
60. Montelone BA, Malone RE (1994) Analysis of the rad3-101 and rad3-102 mutations of *Saccharomyces cerevisiae*: implications for structure/function of Rad3 protein. *Yeast* 10: 13–27. PMID: [8203147](#)
61. Daly MJ, Ling O, Minton KW (1994) Interplasmidic recombination following irradiation of the radioresistant bacterium *Deinococcus radiodurans*. *J Bacteriol* 176: 7506–7515. PMID: [8002574](#)
62. Daly MJ, Minton KW (1995) Interchromosomal recombination in the extremely radioresistant bacterium *Deinococcus radiodurans*. *J Bacteriol* 177: 5495–5505. PMID: [7559335](#)
63. Daly MJ, Minton KW (1996) An alternative pathway of recombination of chromosomal fragments precedes *recA*-dependent recombination in the radioresistant bacterium *Deinococcus radiodurans*. *J Bacteriol* 178: 4461–4471. PMID: [8755873](#)
64. Repar J, Cvjetan S, Slade D, Radman M, Zahradka D, et al. (2010) RecA protein assures fidelity of DNA repair and genome stability in *Deinococcus radiodurans*. *DNA Repair (Amst)* 9: 1151–1161.
65. Cox MM, Goodman MF, Kreuzer KN, Sherratt DJ, Sandler SJ, et al. (2000) The importance of repairing stalled replication forks. *Nature* 404: 37–41. PMID: [10716434](#)
66. Kuzminov A (1999) Recombinational repair of DNA damage in *Escherichia coli* and bacteriophage lambda. *Microbiol Mol Biol Rev* 63: 751–813, table of contents. PMID: [10585965](#)
67. Kuzminov A (1995) Instability of inhibited replication forks in *E. coli*. *Bioessays* 17: 733–741. PMID: [7661854](#)
68. Michel B, Ehrlich SD, Uzest M (1997) DNA double-strand breaks caused by replication arrest. *EMBO J* 16: 430–438. PMID: [9029161](#)
69. Meima R, Rothfuss HM, Gewin L, Lidstrom ME (2001) Promoter cloning in the radioresistant bacterium *Deinococcus radiodurans*. *J Bacteriol* 183: 3169–3175. PMID: [11325946](#)
70. Bonacossa de Almeida C, Coste G, Sommer S, Bailone A (2002) Quantification of RecA protein in *Deinococcus radiodurans* reveals involvement of RecA, but not LexA, in its regulation. *Mol Genet Genomics* 268: 28–41. PMID: [12242496](#)
71. Mennecier S, Coste G, Servant P, Bailone A, Sommer S (2004) Mismatch repair ensures fidelity of replication and recombination in the radioresistant organism *Deinococcus radiodurans*. *Mol Genet Genomics* 272: 460–469. PMID: [15503140](#)
72. Bentchikou E, Servant P, Coste G, Sommer S (2007) Additive effects of SbcCD and PolX deficiencies in the *in vivo* repair of DNA double strand breaks in *Deinococcus radiodurans*. *J Bacteriol*.
73. Devigne A, Ithurbide S, Bouthier de la Tour C, Passot F, Mathieu M, et al. (2015) DdrO is an essential protein that regulates the radiation desiccation response and the apoptotic-like cell death in the radioresistant *Deinococcus radiodurans* bacterium. *Mol Microbiol*.
74. Satoh K, Kikuchi M, Ishaque AM, Ohba H, Yamada M, et al. (2012) The role of *Deinococcus radiodurans* RecFOR proteins in homologous recombination. *DNA Repair (Amst)* 11: 410–418.
75. Dunn OJ (1964) Multiple Comparisons Using Rank Sums. *Technometrics* 6: 241–252.
